# Supplementary material for: Genomic phylogeography of the White-crowned Manakin Pseudopipra pipra (Aves: Pipridae) illuminates a continental-scale radiation out of the Andes
Source: bioRxiv or medRxiv preprint supplement (doi:10.1101/713081), 2021-05-05
Supplement: Supplementary file [file media-1.pdf]

1  
2  
3  
4  
5  
6  
7  
8  
9  
10  
11  
12  
13  
14  
15  
16  
17  
18  
19  
20  
21  
22  
23  
24  
25  
26  
27  
28  
29  
30  
31  
32  
33  
34  
35  
36  
37  
38  
39  
40  
41  
42  
43  
44

Supplementary Appendices for:

**Genomic phylogeography of the White Crowned  
Manakin *Pseudopipra pipra* (Aves: Pipridae) illuminates  
a continental-scale radiation out of the Andes**

**Author Affiliations:**

Jacob S. Berv<sup>1,5\*</sup>, Leonardo Campagna<sup>1</sup>, Teresa J. Feo<sup>2</sup>, Ivandy Castro Astor<sup>3</sup>, Camila Ribas<sup>4</sup>, Richard O. Prum<sup>5</sup>, Irby J. Lovette<sup>1</sup>

1. Fuller Evolutionary Biology Program, Cornell Lab of Ornithology, 159 Sapsucker Woods Road, Ithaca, NY 14850, USA. Department of Ecology and Evolutionary Biology, Cornell University, 215 Tower Road, Ithaca, NY 14853, USA.
2. Department of Vertebrate Zoology, MRC-116, National Museum of Natural History, Smithsonian Institution, Washington, DC 20013, USA.
3. Department of Biology, City College of New York and CUNY Graduate Center, City University of New York, New York, NY 10031, USA
4. Coordenação de Biodiversidade, Instituto Nacional de Pesquisas da Amazônia, Manaus, AM, Brazil
5. Department of Ecology and Evolutionary Biology, and Peabody Museum of Natural History, Yale University, New Haven, Connecticut, 06520, USA.

\*Correspondence to: Jacob S. Berv ([jsb439@cornell.edu](mailto:jsb439@cornell.edu))

## Supplementary Appendix

### Section 1

#### Expanded Taxonomic Summary

45 *Pseudopipra coracina* (Sclater 1856)

Andean White-crowned

51 **Manakin**

52 **Distribution:** Subtropical Andes from Venezuela south to Esmeraldas, Ecuador and San  
53 Martín, Peru.

54 **Phylogenetic Position:** Clade A1, plus multiple unsampled subspecies from the Colombian  
55 and Ecuadorian Andes (Fig. 3).

56 **Comments:** This apparently monophyletic group of northern Andean populations includes  
57 five currently recognized subspecies, each of which may be a distinct species. Three of  
58 these subspecies—*coracina*, *minima*, and *occulta*— have unique, highly differentiated vocal  
59 types, and diagnosable plumage differences. The vocal type of *bolivari* is unknown.

60  
61 *P. c. coracina* (Sclater 1856)

62 **Distribution:** Subtropical forests of the eastern slope of the Andes from western  
63 Venezuela to Morona-Santiago, Ecuador.

64 **Phylogenetic Position:** Based on mtDNA sampled, a member of Clade A1.

65 **Plumage:** Males are moderately glossy on the back. White crown feathers are long  
66 with extensive black bases. Crowns are sometimes slightly grayish. Females are olive  
67 green with lighter yellow belly, and olive gray crown with more olive cheeks.

68 **Lek Vocal Type:** 8 (*errrwer*).

69 **Call Vocal Type:** Unknown

70  
71 *P. c. minima* (Chapman 1914)

72 **Distribution:** Subtropical forests of western Cauca, Colombia south to Esmeraldas,  
73 Ecuador

74 **Phylogenetic Position:** Not Sampled, but a likely member of Clade A1.

75 **Plumage:** Males are moderately glossy; crown feathers are entirely white to their  
76 bases. No females were observed. Chapman (1914) reported that *minima* is smaller  
77 than *anthracina*, and that males lack prominent gray tips on undertails. Freile (2014)  
78 reported one specimen of a female from San Javier, Esmeraldas, Ecuador (100 meters)  
79 and provisionally identified it as *minima*. The specimen is bright olive above and  
80 below with a slightly grayish olive grown. However, this specimen is from a  
81 substantially lower altitude than Colombian records of *minima*, so it may represent an  
82 altitudinal migrant or a distinct population.

83 **Lek Vocal Type:** 9 (*reeee*)

84 **Call Vocal Type:** Unknown

85  
86 *P. c. bolivari* (de Schauensee 1950)

87 **Distribution:** Subtropical forests of southern Córdoba, Colombia. (Not Sampled)

88 **Phylogenetic Position:** Not Sampled, but a likely member of Clade A1.

89 **Plumage:** None observed. Apparently known only from the type specimen from Cerro  
90 Murucucú, Córdoba, Colombia. de Schauensee (1950) described this male specimen as

91 having entirely white feathers in the forecrown, like *minima* and *unica*, but hindcrown  
92 feathers basally black like *coracina*.  
93 **Lek Vocal Type:** Unknown  
94 **Call Vocal Type:** unknown  
95  
96 ***P. c. unica*** (de Schauensee 1945)  
97 **Distribution:** Subtropical forests of Magdalena Valley, Antioquia to Huila, Colombia.  
98 **Phylogenetic Position:** Not Sampled, but a likely member of Clade A1.  
99 **Plumage:** Males are moderate glossy, with long crown feathers that are white to their  
100 bases. Females are olive green above, and slightly gray on the crown; underparts  
101 uniform olive. de Schauensee (1945) described *unica* as glossier than *coracina*, with  
102 longer tail and very long crest.  
103 **Lek Vocal Type:** 11a (*weer-dink*) and 11b (*shureeep*)  
104 **Call Vocal Type:** unknown  
105  
106 ***P. c. occulta*** (Zimmer 1936)  
107 **Distribution:** Eastern slope of the Andes from Zamora-Chinchipe, Ecuador (Freile  
108 2014) south to San Martín, and Huánuco, Peru, west of the Rio Huallaga  
109 **Phylogenetic Position:** Clade A1 (Fig. 3)  
110 **Plumage:** Males are glossy with dark gray bases to crown feathers. Females are dark  
111 olive with dark gray crown and gray throat. Zimmer (1936) described *occulta* as  
112 similar to *comata* but adult males with the occipital feathers slightly shorter and with  
113 the crown and occipital feathers sooty at the base instead of entirely white.  
114 **Lek Vocal Type:** 1 (*trill-dink*) and 10 (*bree*)  
115 **Call Vocal Type:** unknown  
116  
117 ***Pseudopipra anthracina*** (Ridgway 1906) **Western White-crowned**  
118 **Manakin**  
119 **Distribution:** Subtropical Costa Rica to Western Panama  
120 **Phylogenetic Position:** Clade A2 (Fig. 3)  
121 **Plumage:** Males less lustrous on back than all other *Pseudopipra* populations, white crown  
122 feathers gray or dark gray at base. Female are olive green with slaty crown and face.  
123 Ridgway (1906) considered *anthracina* to have shorter wings, smaller beak, less lustrous  
124 plumage than *pipra* with undertails tipped with gray.  
125 **Lek Vocal Type:** 4 (*jureeee*)  
126 **Call Vocal Type:** unknown  
127  
128 ***Pseudopipra comata*** (Berlepsch and Stolzmann 1894) **Junín White-crowned**  
129 **Manakin**  
130 **Distribution:** Subtropical Andes of Peru from Cerro Azul, Loreto (east and south of the Rio  
131 Huallaga) to southern Huánuco, Pasco, Junín, and northern Cusco.  
132 **Phylogenetic Position:** Clade B (Fig. 3).  
133 **Plumage:** Males are glossy black above, crown feathers longer and entirely white to their  
134 bases. Females are bright olive green above, gray on crown and face, slightly gray on throat,  
135 dark olive below, and slightly dark gray on the belly.  
136 **Lek Vocal Type:** One record, statistically similar to type 1 (*trill-dink*)

137 **Call Vocal Type:** unknown  
138 **Comment:** *P. comata* is also composed of two well differentiated subclades. The northern  
139 clade (B1) is known from Cerro Azul in Loreto, Peru. The southern clade (B2) is known  
140 from extreme southern Huánuco (Cerros del Sira, 9°30'S 74°47'W; AMNH 820866, 820952),  
141 Pasco, Junín, and Cusco. The type locality of *comata* is Vitoc, Junín within the southern  
142 clade. Further investigation plumage and behavioral is necessary to determine whether the  
143 Cerro Azul populations should be recognized as a distinct, new taxon.

144  
145 *Pseudopipra pygmaea* (Zimmer 1936) **Huallaga White-crowned**

146 **Manakin**

147 **Distribution:** Tropical forest of Lower Rio Huallaga Valley, Peru

148 **Phylogeneic Position:** Sister to Clade F (mtDNA)

149 **Plumage:** Males: Glossy, with black bases to crown feathers. Females are olive above and  
150 gray below with a band of olive across the chest; crown and face only slightly darker than  
151 back, not gray. Zimmer (1936) described males as having long crest with gray bases, crown  
152 sometimes slightly ashy; females are much paler than *occulta*; throat and belly decidedly  
153 more whitish, breast paler duller green; lighter even than *microlopha*.

154 **Lek Vocal Type:** 2 (*deeeer*)

155 **Call Vocal Type:** 13

156 **Comment:** Lowland populations along the Rio Huallaga have been named *pygmaea*  
157 (Zimmer 1936). Our four samples of *pygmaea* from Jeberos, Peru did not yield sufficient  
158 quality DNA for RADseq, but all four had a phylogenetically distinct mtDNA haplotype  
159 which placed this lineage as the sister group to all other lowland populations of  
160 *Pseudopipra*. These populations have song type 2, which appears to be shared  
161 plesiomorphically with *P. discolor* and *P. microlopha separabilis* from Para, Brazil.

162  
163 *Pseudopipra discolor* (Zimmer 1936) **Napo White-crowned**

164 **Manakin**

165 **Distribution:** Tropical forest in Napo, Ecuador and northern Loreto, Peru south to the Rio  
166 Marañón.

167 **Phylogenetic Position:** Clade E (Fig. 3)

168 **Distribution:** Tropical forest in Napo, Ecuador south to the Rio Marañón

169 **Plumage:** Males are glossy black above, white crown feathers with black or dark gray  
170 bases. Females are dusky olive overall, slightly grayer on crown, and grayer belly. Zimmer  
171 (1936) described male *discolor* as glossier and bluer above than *pipra*.

172 **Lek Vocal Type:** 2 (*deeeer*)

173 **Call Vocal Type:** 13

174 **Comment:** This lineage was found to have both a distinct, unique history, with subsequent  
175 introgression with adjacent populations of the northern Amazonian clade. The nature of  
176 this introgression indicates this lineage may be best recognized as a distinct hybrid species.

177  
178 *Pseudopipra pipra* (Linneaus 1758) **Northern White-crowned**

179 **Manakin**

180 **Distribution:** Tropical forest of eastern Colombia, southern Venezuela, the Guianas, and  
181 Brazil north of the Amazon. West to the right (north) bank of the Rio Putumayo, Colombia.

182 **Phylogenetic Position:** Clade D (Fig. 3).



183 **Plumage:** Males are glossy black above, crown feathers longer with extensive black bases.  
184 Females are dark olive above, olive below, grayer on belly, and occasionally only slightly  
185 darker gray on crown.

186 **Lek Vocal Type:** 3 (*buzzzzz*)

187 **Call Vocal Type:** 5 (*zeee*)

188

189 *Pseudopipra microlopha* (Zimmer 1929)

**Southern White-crowned**

190 **Manakin**

191 **Distribution:** Tropical forest of eastern Peru south of the Rio Marañón, and south of the  
192 Amazon east to Pará, Brazil, and subtropical forests between the Rio Huallaga and Rio  
193 Ucayali

194 **Phylogenetic Position:** Paraphyletic, including Clade C without Clade C7 (Fig. 3).

195 **Comments:** A paraphyletic group (with respect to *P. cephaleucos* from Brazilian Atlantic  
196 forest) which includes three, currently recognized subspecies, and four additional  
197 genetically well-supported monophyletic subgroups that may be recognized as new taxa.  
198 Furthermore, we identified a genetically distinct montane clade from the highlands  
199 between Rio Huallaga and Rio Ucayali that has not been previously described, and may  
200 have distinct plumage and vocal characters.

201

202 ***P. m.* undescribed subspecies**

203 **Distribution:** Subtropical forest from the highlands between Rio Huallaga and Rio  
204 Ucayali All samples are from a single locality: 77 km WNW Contamana, Loreto, Peru;  
205 7.08333° S, 75.65° W).

206 **Phylogenetic Position:** Clade C2 (Fig. 3)

207 **Plumage:** Not examined.

208 **Lek Vocal Type:** Unknown

209 **Call Vocal Type:** 13

210

211 *P. m. microlopha* (Zimmer 1929)

212 **Distribution:** Eastern Peru south of the Rio Marañón and Rio Huallaga west to Rio  
213 Juruá and Rio Purus, Brazil.

214 **Phylogenetic Position:** Apparently paraphyletic, Clade C1 excluding C2 (Fig. 3)

215 **Plumage:** Males are glossy black above, with black or dark gray bases to white crown  
216 feathers. Females are dark olive above, occasionally with slightly gray crown, olive  
217 below, and graying on the belly.

218 **Lek Vocal Type:** 7 (*jeer*)

219 **Call Vocal Type:** 13

220

221 ***P. m.* undescribed subspecies**

222 **Distribution:** Right (east) bank of the Rio Purus to the left (west) bank Rio Madeira

223 **Phylogenetic Position:** Clade C3 (Fig. 3)

224 **Plumage:** Not examined.

225 **Lek Vocal Type:** Unknown

226 **Call Vocal Type:** 13

227

228 ***P. m.* undescribed subspecies**

229 **Distribution:** Right (east) bank of the Rio Madeira to the left (west) bank the Rio  
230 Tapajos.

231 **Phylogenetic Position:** (Clade C4, Fig. 3)

232 **Plumage:** Not examined.

233 **Lek Vocal Type:** Unknown

234 **Call Vocal Type:** 13

235

236 ***P. m. undescribed subspecies***

237 **Distribution:** Right (east) bank of the Rio Tapajos to the left (west) bank of the Rio  
238 Xingu

239 **Phylogenetic Position:** Clade C5 (Fig. 3)

240 **Plumage:** Not examined.

241 **Lek Vocal Type:** 6b

242 **Call Vocal Type:** 13

243

244 ***P. m. separabilis*** (Zimmer 1936)

245 **Distribution:** Right (east) bank of the Rio Xingu east to central and southern Pará.

246 **Phylogenetic Position:** Clade C6 (Fig. 3)

247 **Plumage:** Males are moderately glossy above, crown long with large, dark gray  
248 feather bases. Predefinitive male plumage light olive above, gray below, with medium  
249 gray crown.

250 Females are light olive above, light grayish below with olive wash on the breast.

251 Zimmer (1939) Zimmer (1939) commented that adult males and females not

252 distinguishable from *separabilis*, but he identified the distinct predefinitive male  
253 plumage

254 **Lek Vocal Type:** 2

255 **Call Vocal Type:** 13

256

257 ***Pseudopipra cephaleucos*** (Thunberg 1822)

**Atlantic White-crowned**

258 **Manakin**

259 **Distribution:** Tropical forest from Bahia south to northern Rio de Janeiro, Brazil.

260 **Phylogenetic Position:** Clade C7 (Fig. 3)

261 **Plumage:** Males are glossy black with a long and slightly gray crown. Crown feather have  
262 extensive dark gray bases. Predefinitive males have olive backs, pure white or grayish  
263 white crowns, and slate gray on the face, throat, and belly. Females have olive back, dusky  
264 gray on head, gray below, slightly olive on breast, lighter on belly.

265 **Lek Vocal Type:** 6a (*zeeee-tonk*)

266 **Call Vocal Type:** 13

267

268

269

270

## Section 2

271

### Additional results and discussion

272

273 *Additional phylogenetic results and comments on mutational spectra*

274

275 At the level the concatenated alignments, the '20% missing' dataset had a total of  
276 2,548 132bp loci (340,956 sites), 7.92% missing sites, 8,063 parsimony informative sites,  
277 and 5,709 variable parsimony-uninformative sites. The '50% missing' dataset had a total of  
278 4,763 132 bp loci (626,868 sites), 20.48% missing sites, 15,365 parsimony informative  
279 sites, and 11,221 variable parsimony-uninformative sites. The '80%' missing dataset had a  
280 total of 7,907 132 bp loci (1,039,632 sites), 38.89% missing sites, 24,450 parsimony  
281 informative sites, and 17,839 variable parsimony-uninformative sites. Across these  
282 datasets, alpha from the GTR+G model was  $\ll 1$  (0.069,  $SD=6.033 \times 10^{-4}$ ), indicating high  
283 among site rate heterogeneity for these ddRAD loci. Chi-square tests of base compositional  
284 heterogeneity rejected the hypothesis of compositional homogeneity (Chi-sq= 7822.93,  
285  $df=702$ ,  $P \ll 0.05$ ), with slight bias observed on the AT-GC axis of compositional variation  
286 (A: 0.24968, C: 0.25225, G: 0.24301, T: 0.24301, on the largest 80% dataset). Maximum  
287 likelihood estimates of transition rates were  $\sim 8x$  transversion rates (A $\leftrightarrow$ G: 7.34 x G  $\leftrightarrow$   
288 T, C  $\leftrightarrow$  T: 8.13 x G  $\leftrightarrow$  T), as estimated in RAxML. Estimated rates among other  
289 nucleotide classes were  $\sim 1$  relative to the fixed G  $\leftrightarrow$  T rate, suggesting that the available  
290 GTR model in RAxML is likely over-parameterized for ddRAD data.

291

#### 292 *Reconstruction of mitochondrial ND2 gene tree*

293

294 After obtaining mitochondrial DNA sequences for 168 individuals (Supplementary  
295 Table 1), we aligned these sequences using MAAFT (Standley and Katoh 2013). The  
296 alignment was visually inspected in Sequencher (Gene\_Codes\_Corporation 2010), and then  
297 analyzed in IQ-TREE 1.6.10 (Schmidt et al. 2014, Chernomor et al. 2016, Trifinopoulos et al.  
298 2016, Hoang et al. 2017, Kalyaanamoorthy et al. 2017). We partitioned by codon position  
299 and generated a maximum likelihood tree using the MFP+MERGE model search and  
300 partitioning option, with 1000 ultrafast bootstrap replicates. MFP+MERGE detected that an  
301 optimal scheme comprised of three partition-models for each of the three codon positions  
302 (CP1: TIM2+F+I; CP2: TIM2+F+G4; CP3: TIM2+F+G4). Nodes recovered with ultrafast  
303 bootstrapped  $< 95$  were collapsed. The recovered topology was entirely congruent with the  
304 topology presented in the main text as derived from ddRAD data, with a few exceptions  
305 (Supplementary Figure 14). Our mtDNA dataset included individuals from subspecies  
306 *coracina* and *pygmaea* which were derived from low quality tissue samples (and hence  
307 were not suitable for ddRAD sequencing). This enabled us to make a preliminary  
308 assessment of their phylogenetic affinities (main text), though nuclear genomic data should  
309 be collected in future studies. Notably, the introgressed western Napo lineage has mtDNA  
310 haplotypes which are members of the southern amazon clade (BS 98), which is consistent  
311 with the scenario of hybrid origin and introgression we develop in the main text. Because  
312 mtDNA is inherited matrilineally, a potential implication of this pattern is that the  
313 introgressed Napo lineage (S2a/S2 in Figure 6) was created when southern progenitor  
314 females were introgressed with northern males.

315

#### 316 *Reconstruction of ancestral elevational habit*

317

318 We performed a Bayesian stochastic character mapping analysis (Huelsenbeck et al.  
319 2003, Bollback 2006) to estimate the ancestral habit of *Pseudopipra*. In brief, we coded  
320 lineages as montane ( $>1000m$ ) or lowland ( $< 1000m$ ), applied a bi-directional Mk model

321 ('ARD') and performed 100 simulations (see supplemental R code) using the RAxML  
322 topology. We used the SIMMAP implementation in phytools (Revell 2012). These analyses  
323 unambiguously reconstructed the ancestral habit of *Pseudopipra* to be montane.

324

#### 325 *STRUCTURE - additional results*

326

327 The Evanno method applied to the whole dataset detected a significant shift in the  
328 rate of change of the log probability of the data between K1 and K2, indicating a deep  
329 hierarchical split in the data. As STRUCTURE infers the degree of admixture among  
330 individuals, this assignment is not directly comparable to K-means phenetic cluster  
331 solutions, which lump individuals categorically based on overall genetic similarity. That  
332 said, there was broad overlap in cluster assignment.

333

#### 334 *Descriptive Population Genetic Statistics – methods*

335

336 For population genetic statistics, we considered eighteen population-areas (Figure  
337 3, 4). Most of these populations are delimited by clear geographic barriers (e.g., rivers in  
338 the cases of previously identified areas of endemism, the Andes, or the Cerrado belt) and  
339 have strong phylogenetic support. Two subgroups within the broad Northern Amazonian +  
340 Guiana Shield lowland clade were defined on the basis of low-support monophyly in the  
341 RAxML analysis *and* coincidence with geographic features. One of these comprised  
342 individuals unambiguously assigned to northern Amazonian clade in phylogenetic analysis,  
343 but which were also restricted to the eastern Napo area of endemism, east of the Rio  
344 Putumayo (brown dots in Figures 3, 4, 'weakly resolved eastern Napo' – abbreviated in R  
345 code and Supplementary Figures as 'GSNapo'). The second comprised individuals found  
346 near the coasts in Suriname and the Brazilian state of Amapá, east of the Essequibo river  
347 (pale blue dots in Figures 3, 4: 'Suriname + Amapá' – abbreviated in R code and  
348 Supplementary Figures as 'GSSR'). Another subgroup was defined on the basis of  
349 restriction to the Jaú area of endemism (pale yellow dots in Figures 3, 4: 'unresolved Jaú' –  
350 abbreviated in R code and Supplementary Figures as 'GSImeri'). Lastly, a fourth group of  
351 individuals included all other individuals in the lowland northern Amazon clade, restricted  
352 to the Guiana Shield (green dots in Figure 3, 4: 'weakly resolved Guiana Shield' –  
353 abbreviated in R code and Supplementary Figures as 'GS'), comprising individuals east of  
354 the Jaú group (above), and west of those in the Suriname + Amapá group. The primary  
355 geographic barriers in this region separating western and eastern Guiana Shield  
356 populations seems to be the Guiana Highlands, which is where tepuis are found, as well as  
357 the Essequibo river.

358

359 For these descriptive analyses, we focus on the aforementioned eighteen areas as  
360 units of comparison because focusing on broader populations delimited by cluster analyses  
361 would likely generate statistics biased by population sub-structure—i.e, lower than  
362 expected heterozygosities (Wahlund 1928). Further, groups delimited by broader cluster  
363 assignments may be more reflective of ancestral populations, and therefore not indicative  
364 of presently restricted groups (ie, inappropriately moving migrants back to their source  
365 populations, Kuhner 2006). Statistics were calculated using dataset 2, as this includes that  
366 largest number of putatively unlinked markers (the first SNP from each of 2,581 ddRAD  
loci), unless otherwise indicated.

367 To estimate a measure of genetic diversity across these sampling regions, we  
368 calculated the rarefied allelic richness per population (restricted to populations comprising  
369 > 5 individuals) using the allelic.richness function in the hierfstat R package (Goudet 2005),  
370 after removing all sites with missing genotypes (Supplemental R Script).

371 We also calculated the inbreeding coefficient  $F_{IS}$ , defined as  $(H_S - H_I)/H_S$ , where  $H_I$  is  
372 the mean expected heterozygosity per individual within subpopulations, and  $H_S$  is the  
373 mean expected heterozygosity within random mating populations (Goudet 2005). We  
374 generated 100,000 bootstrapped estimates of  $F_{IS}$ , sampling over loci per population, using  
375 the boot.ppfis function in hierfstat (Goudet 2005). For recently hybrid individuals,  $F_{IS}$   
376 should be more outbred (relative heterozygosity) than their parental genotypes. We tested  
377 the hypothesis that the introgressed western Napo population is composed of recently  
378 introgressed individuals by estimating the inbreeding coefficient for a simulated F1  
379 population, comprised of the progenitor lineages discussed in the main text. We generated  
380 a simulated F1 population using the hybridize function in adegenet (Jombart 2008), and  
381 then estimated its inbreeding coefficient as described above to compare to empirical  
382 estimates from source populations.

383 To perform a preliminary assessment of the potential for evolutionary processes  
384 deviating from the assumptions of Hardy-Weinberg equilibrium, we applied the hw.test  
385 function in the pegas R package (Paradis 2010) with 1000 Monte Carlo permutations of  
386 alleles to compute an exact p value for each locus within each population. To assess the  
387 assumption of linkage intrinsic to most model-based analyses in this study, we computed  
388 the Standardized Index of Association  $\bar{r}_d$  (Brown et al. 1980, Agapow and Burt 2001)  
389 within populations using the poppr summary function in the poppr R package (Kamvar et  
390 al. 2014), and estimated p values with 1000 permutations. We estimated pairwise Weir and  
391 Cockerham's (Weir and Cockerham 1984)  $F_{st}$  among all 18 areas, and evaluated  
392 significance using 1000 bootstrapped datasets to estimate 95% confidence intervals using  
393 the 'assigner' R package (Gosselin et al. 2016).

394 Lastly, we quantified differentiation among two hierarchical strata recapitulating 1)  
395 deep coalescent structure (6 groups as identified by SVDquartets (~K5 from STRUCTURE +  
396 putative introgressed Napo hybrids as a separate group), and 2) populations identified in  
397 phylogenetic analyses which coincide with geographic barriers (18 groups), with analysis  
398 of molecular variance (AMOVA) (Excoffier et al. 1992). We used the poppr.amova wrapper  
399 function in the poppr R package (Kamvar et al. 2014) to perform AMOVA on adegenet  
400 genind objects, set to use the ade4 implementation of AMOVA with 1000 permutations to  
401 assess significance. For AMOVA calculations we used dataset 1, to minimize within  
402 individual variance.

#### 403 404 *Descriptive population genetic statistics – results*

405  
406 Missing data (dataset2) was quite low across areas (mean: ~9.5%, SD: 5.3% and  
407 ranged from ~2.4% (Jaú subgroup of the Guiana Shield clade) to a maximum of 20.5%  
408 (Costa Rica, though this was somewhat of an outlier – 75% of these areas had less than  
409 13% missing data overall). Despite the fact that our sampling scheme among areas  
410 delimited by geographic boundaries had high variance relative to the mean (mean: 12.94 [1  
411 - 70], SD: 16.95284, CoV: 1.31), the sum rarefied estimates of allele counts in each of 13  
412 areas (with > 5 individuals, and after filtering out all sites with missing genotypes) were

413 similar. For dataset 2 (2581 SNPs): mean number of alleles: 297.76, SD: 6.44, CoV: 0.022.  
 414 The greatest allelic diversity was found in the Jaú (n=14, 305.75 alleles) and introgressed  
 415 western Napo population (n=10, 303.8 alleles). The lowest allelic richness was found to be  
 416 in the Rio (n=10, 287.15) and Bahia (n=6, 285.48 alleles) Atlantic Forest populations,  
 417 followed closely by Panamanian populations (n=5, 292 alleles). These results are generally  
 418 consistent with our EEMS analysis (Supplementary Figure 12). Summary table below:  
 419

| <b>Population</b>                       | <b>Alleles</b> |
|-----------------------------------------|----------------|
| Atlantic Forest (Bahia)                 | 285.4848       |
| Atlantic Forest (Rio)                   | 287.1516       |
| Central America (Panama)                | 292.0000       |
| South Andean Peru (South)               | 294.0000       |
| Eastern Inambari endemic                | 297.4178       |
| Xingu endemic                           | 297.5155       |
| Weakly resolved Guiana Shield (western) | 299.4562       |
| Weakly resolved Suriname + Amapá        | 299.5588       |
| Inambari endemic (western)              | 302.4655       |
| Weakly resolved eastern Napo            | 302.4864       |
| Tapajós endemic                         | 303.7529       |
| Western Napo introgressed lineage       | 303.7964       |
| Unresolved Jaú                          | 305.7571       |

420  
 421 Most populations were detected to be significantly inbred ( $F_{IS} > 1$ , Supplementary  
 422 Figure 9), with lower 95% confidence intervals  $> 0$ . Panamanian, Costa Rican, South  
 423 Andean (North clade), Rondônia, and Espírito Santo clades had 95% confidence intervals  
 424 which overlapped zero, and thus cannot be confidently inferred to have positive or  
 425 negative  $F_{IS}$ . The simulated F1 population, however, did have significantly negative  $F_{IS}$ , as  
 426 predicted. This pattern implies that the introgressed western Napo population, which was  
 427 detected to have a significantly positive  $F_{IS}$ , is not likely to include recently introgressed  
 428 individuals. Indeed, the confidence intervals for eastern Napo, Jaú, Inambari and western  
 429 Napo populations, are generally overlapping, with similar means (mean of mean estimates  
 430  $\sim 0.17$ , SD of mean estimates  $\sim 0.02$ , Supplementary Figure 9).

431 Pairwise population estimates of Weir and Cockerham's  $F_{ST}$  ranged from essentially  
 432 undifferentiated, to almost entirely distinct. At the most extreme: comparing the  
 433 geographically proximate eastern Napo and Jaú populations (both weakly resolved in  
 434 phylogenetic analyses, but likely sister) --  $F_{ST}$ : 0.0045. By contrast, comparing an Atlantic  
 435 forest Espírito Santo population to a population in Panama indicates an  $F_{ST}$  of 0.81, or  
 436 almost entirely differentiated. Overall, population average  $F_{ST}$  was very high: 0.196 [0.188-  
 437 0.204] (Supplementary Figure 10).

438 After correcting for multiple tests with the Benjamin & Hochberg correction, exact  
 439 tests of Hardy-Weinberg equilibrium suggested most loci in most populations were in  
 440 equilibrium. However, a small number of loci in the western Guiana group (123 loci),  
 441 Suriname+Amapá (53 loci) and Tapajós (14 loci) areas were identified as being out of  
 442 Hardy-Weinberg equilibrium. Estimates of  $\bar{r}_d$  within these populations indicated that there

443 was no strong evidence of linkage among loci within populations, except for the Tapajós  
444 area, in which weak linkage was detected ( $\bar{r}_d$ : 0.005956,  $p$ = 0.000999).

445 Lastly, an AMOVA detected significant population differentiation at all evaluated  
446 levels, including between coalescent units (well supported clades form SVDquartets)  
447 (~32%) and between samples within coalescent units (~5%) ( $p$  < 0.001 for all). Re-  
448 running the same AMOVA with evolutionary distances estimated with RAxML branch  
449 lengths (instead of the default allelic distance) indicated the same pattern, but with more of  
450 the variance explained by coalescent and population level strata (41.3% and 12.6%  
451 respectively). Both AMOVA analyses detected a significant proportion of the variance  
452 attributable to within sample variance (62% and 46% respectively).

453

#### 454 *Isolation by distance and the effect of geography*

455

456 The evolutionary history of *Pseudopipra* within the Amazon basin appears to be  
457 deeply connected to the South American landscape, adding additional support to a rich  
458 body of literature endorsing this hypothesis (Cracraft and Prum 1988, Brumfield 2012).  
459 For virtually all evaluated cases, we find significant effects of geographic barriers on  
460 structuring genetic variation within this species complex, including the Amazon River and  
461 most associated tributaries (Supplementary Table 2b and Figure 7). Further afield, the  
462 'dry-diagonal' Cerrado belt appears to have strongly isolated Atlantic Forest lineages from  
463 their southeastern Amazonian Xingu relatives, as do the Andes exhibit a disproportionate  
464 effect on divergence between Peruvian foothills populations and Central American lineages  
465 (with the caveat that our sampling in that area is sparse, so our power to infer spatial  
466 patterns is necessarily limited).

467 The establishment of the Amazonian river system has recently been questioned as a  
468 driver of species—level variation across key areas in the Neotropics (Oliveira et al. 2017,  
469 Santorelli et al. 2018). These recent studies used distributional data to infer the effects of  
470 key proposed barriers and concluded that while large rivers clearly limit some Amazonian  
471 species—the large number of exceptions to this 'rule' point towards alternative speciation  
472 mechanisms as the norm, rather than as the exception. Indeed, rivers can plausibly function  
473 as contemporary species limits without being the source of such limits (Santorelli et al.  
474 2018). In the case of *Pseudopipra*, river barriers have clearly contributed to contemporary  
475 patterns of genetic diversity, regardless of whether or not the formation of the Amazonian  
476 drainage system was the primary driver of generating that diversity. Importantly, studies  
477 which rely on distributional data alone are limited in that their statistical power is entirely  
478 contingent on the accuracy of species and subspecies delimitation. In the biogeographic  
479 context of the Amazon, this is likely to be enormously underestimated for birds (Brumfield  
480 2012, Smith et al. 2014). This fundamental limitation in our knowledge of cryptic avian  
481 diversity is therefore likely to bias inferences derived from distributional data, which is  
482 based on mostly untested species limits. Indeed, most studies that use genetic data to  
483 investigate the effect of river or other physical barriers in structuring Neotropical avian  
484 diversity have inferred strong, though varying effects (e.g. Moore et al. 2008, Harvey and  
485 Brumfield 2015, Naka and Brumfield 2018).

486 A number of authors have also noted that the practice of identifying genetic clusters  
487 with model based approaches often fail to appropriately account for the effects of isolation  
488 by distance (Guillot et al. 2013), and various methods are in development to improve our

489 ability to model such correlated phenomena (Bradburd et al. 2013, Botta et al. 2015,  
490 Petkova et al. 2015, Bradburd et al. 2017). STRUCTURE in particular has been highlighted  
491 as potentially suffering from over-estimating K as a consequence of spatial autocorrelation  
492 in widely distributed genetic data (Bradburd et al. 2017). Our STRUCTURE analysis  
493 appears to exhibit this behavior for the southern Amazon, with a genetic cline of admixture  
494 that falls on a longitudinal gradient across the southern Amazon and ends in the well  
495 differentiated Atlantic Forest Rio population. While it is plausible that isolation by distance,  
496 combined with physical barriers to gene flow, could generate a similar pattern (as implied  
497 by our phylogenetic analyses), it is important to keep this caveat in mind when interpreting  
498 STRUCTURE results. For example, STRUCTURE may suggest that a scenario of K2 with an  
499 admixture gradient between two populations is preferred, when K1 with an isolation by  
500 distance effect may be a better description and more biologically plausible model for the  
501 data (Bradburd et al. 2017). The degree to which this kind of spatial autocorrelation  
502 confounds STRUCTURE-like analyses at large remains an open and important area of  
503 inquiry. Our EEMS analysis attempts to circumvent this issue entirely, assuming a more  
504 biologically realistic process of continuous differentiation across a heterogeneous  
505 landscape, however it does not provide unambiguous insight into hypotheses of species  
506 delimitation.

507

#### 508 *Notes on congruent patterns with Ceratopipra*

509

510 Within the manakins, a recent molecular phylogeny (Ohlson et al. 2013) placed  
511 *Pseudopipra* as sister to the genus *Ceratopipra*, which includes five well-recognized species  
512 that are extensively codistributed with *Pseudopipra*. The breakpoints among these  
513 *Ceratopipra* species are highly concordant with the breakpoints among the genetic clusters  
514 within the *Pseudopipra* complex that we have presented here, implying that these taxa have  
515 many components of their phylogeographic history in common. *Pseudopipra* is the Andean  
516 sister group to the lowland *Ceratopipra*, which has itself expanded into montane habitats  
517 twice (*cornuta* and *chloromeros*). By contrast, *Pseudopipra* expanded from the Andes into  
518 the lowlands.

519 *Ceratopipra erythrocephala* is distributed in the northern Amazon, and *C.*  
520 *rubrocapilla* has a range encompassing the southern Amazon and the Atlantic Forest. *C.*  
521 *mentalis* is distributed in Central America and south-ward into the Chocó and the western  
522 edges of Columbia and Ecuador. *C. chloromeros* has a narrow distribution in the lower  
523 montane forests of the southern Peruvian and northern Bolivia Andes. The distributions of  
524 *C. erythrocephala* and *rubrocapilla* are extensively with the Guianan Shield and Southern  
525 Amazonian clades of *Pseudopipra*. However, the *Pseudopipra* radiation also has some  
526 important differences from *Ceratopipra*. *C. cornuta* is distributed in montane forests of  
527 tepuis in Venezuela and western Guyana, at altitudes where *Pseudopipra* does not occur. In  
528 contrast, *Pseudopipra* has extensive montane populations in the Andes from Peru to  
529 Colombia, and *C. chloromeros* is only distributed in the eastern slope of the Andes in Peru  
530 and Bolivia. *C. mentalis* is found in lowland tropical forest at lower altitudes than the lower  
531 montane populations of *Pseudopipra* in Central America. Furthermore, the Chocó  
532 population of *Pseudopipra* is also lower montane in distribution, and not continuous with  
533 Central America. Lastly, the phylogenetic relationships among the differentiated lineages of  
534 *Ceratopipra* and *Pseudopipra* are not congruent. In *Ceratopipra*, the northern and southern



535 Amazonian lineages are not sister taxa. Rather, the northern Amazonian *erythrocephala* is  
536 sister to the Central American and Chocó *mentalis*, and southern Amazonian *rubrocapilla* is  
537 sister to the Andean *chloromeros* (Ohlson 2013).

538

#### 539 *Vocal variation*

540

541 *Pseudopipra* vocalizations have 1-3 buzzy or tonal notes. We measured: 1) starting  
542 frequency, 2) ending frequency, 3) minimum frequency, 4) maximum frequency, 5) number  
543 of notes, and 6) duration of the entire vocalization (see Supplementary Figure 13). To  
544 obtain a conservative estimate of the number of individuals sampled, we took  
545 measurements of one vocalization from each recording. When there were multiple  
546 recordings by the same recordist on the same day and location, only one of the recordings  
547 was measured. Some recordists raised the possibility that the tonal notes, particularly the  
548 'tonk' in vocal type 1, may be a mechanical sound, but further research is required to  
549 determine which sounds are vocalizations and which are mechanical sonations. We  
550 performed principal components analysis (PCA) and logistic regression on the vocal  
551 measurements to test for significant differences between the vocal types and to reduce the  
552 dimensionality of the data for comparison to results from analysis of genetic data. The PCA  
553 analysis was performed using the princomp function and the logistic regression was  
554 performed using the glm function, both in the stats R package (R\_Core\_Team 2018). The  
555 geographic distribution of each vocal type was assessed using latitude and longitude  
556 coordinates included in the metadata of each recording. When no coordinates were  
557 available, we determined latitude and longitude based on the description of the locality.  
558 Because no sound records were directly associated with genetic samples in this study, we  
559 used geographic proximity to vocalization recordings and localization to areas of  
560 endemism or areas bounded by clear physical barriers to associate vocal types to genetic  
561 samples. This approach assumes that genetically and geographically proximate individuals  
562 are likely to share the same vocal type and enabled us to perform a preliminary assessment  
563 of how variation in vocalizations maps onto existing genetic variation. Testing the fine-  
564 scale association of genetic and vocalization boundaries will require extensive field  
565 sampling of both traits from individual manakins.

566

567

568

569

570

571

572

573

574

575

576

577

578

579

580

Literature Cited

- 581  
582  
583 Agapow PM, Burt A. 2001. Indices of multilocus linkage disequilibrium. *Molecular Ecology*  
584 *Notes*, 1:101-102.
- 585 Bollback JP. 2006. SIMMAP: Stochastic character mapping of discrete traits on phylogenies.  
586 *BMC Bioinformatics*, 7.
- 587 Botta F, Eriksen C, Fontaine MC, Guillot G, Yu D. 2015. Enhanced computational methods for  
588 quantifying the effect of geographic and environmental isolation on genetic  
589 differentiation. *Methods in Ecology and Evolution*, 6:1270-1277.
- 590 Bradburd G, Coop G, Ralph P. 2017. Inferring Continuous and Discrete Population Genetic  
591 Structure Across Space. *bioRxiv*.
- 592 Bradburd GS, Ralph PL, Coop GM. 2013. DISENTANGLING THE EFFECTS OF  
593 GEOGRAPHIC AND ECOLOGICAL ISOLATION ON GENETIC  
594 DIFFERENTIATION. *Evolution*, 67:3258-3273.
- 595 Brown AHD, Feldman MW, Nevo E. 1980. Multilocus Structure of Natal Populations of  
596 *Hordeum Spontaneum*. *Genetics*, 96:523-536.
- 597 Brumfield RT. 2012. Inferring the origins of lowland Neotropical birds. *The Auk*, 129:367-376.
- 598 Chernomor O, Minh BQ, von Haeseler A. 2016. Terrace Aware Data Structure for  
599 Phylogenomic Inference from Supermatrices. *Systematic Biology*, 65:997-1008.
- 600 Cracraft J, Prum RO. 1988. PATTERNS AND PROCESSES OF DIVERSIFICATION:  
601 SPECIATION AND HISTORICAL CONGRUENCE IN SOME NEOTROPICAL  
602 BIRDS. *Evolution*, 42:603-620.
- 603 Excoffier L, Smouse PE, Quattro JM. 1992. Analysis of Molecular Variance Inferred from  
604 Metric Distances among DNA Haplotypes: Application to Human Mitochondrial DNA  
605 Restriction Data. *Genetics*, 131:479-491.
- 606 Gene\_Codes\_Corporation. 2010. Sequencher version 5.0 sequence analysis software. Ann Arbor  
607 Michigan.
- 608 Gosselin T, Anderson EC, Ferchaud A-L. 2016. thierrygosselin/assigner: v.0.4.0 (Version 0.4.0).  
609 Zenodo. <http://doi.org/10.5281/zenodo.197418>.
- 610 Goudet J. 2005. hierfstat, a package for r to compute and test hierarchical F-statistics. *Molecular*  
611 *Ecology Notes*, 5:184-186.
- 612 Guillot G, Schilling R, Porcu E, Bevilacqua M. 2013. Validity of covariance models for the  
613 analysis of geographical variation. *arXiv:1311.4136*.
- 614 Harvey MG, Brumfield RT. 2015. Genomic variation in a widespread Neotropical bird (*Xenops*  
615 *minutus*) reveals divergence, population expansion, and gene flow. *Molecular*  
616 *Phylogenetics and Evolution*, 83:305-316.
- 617 Hoang DT, Vinh LS, Chernomor O, Minh BQ, von Haeseler A. 2017. UFBoot2: Improving the  
618 Ultrafast Bootstrap Approximation. *Molecular Biology and Evolution*, 35:518-522.
- 619 Huelsenbeck JP, Nielsen R, Bollback JP. 2003. Stochastic Mapping of Morphological  
620 Characters. *Systematic Biology*, 52:131-158.
- 621 Jombart T. 2008. adegenet: a R package for the multivariate analysis of genetic markers.  
622 *Bioinformatics*, 24:1403-1405.
- 623 Kalyaanamoorthy S, Minh BQ, Wong TKF, von Haeseler A, Jermini LS. 2017. ModelFinder:  
624 fast model selection for accurate phylogenetic estimates. *Nature Methods*, 14:587.
- 625 Kamvar ZN, Tabima JF, Grünwald NJ. 2014. Poppr: an R package for genetic analysis of  
626 populations with clonal, partially clonal, and/or sexual reproduction. *PeerJ*, 2:e281.

627 Kuhner MK. 2006. LAMARC 2.0: maximum likelihood and Bayesian estimation of population  
628 parameters. *Bioinformatics*, 22:768-770.

629 Moore RP, Robinson WD, Lovette IJ, Robinson TR. 2008. Experimental evidence for extreme  
630 dispersal limitation in tropical forest birds. *Ecology Letters*, 11:960-968.

631 Naka LN, Brumfield RT. 2018. The dual role of Amazonian rivers in the generation and  
632 maintenance of avian diversity. *Science Advances*, 4.

633 Ohlson JJ, Fjeldså J, Ericson PGP. 2013. Molecular phylogeny of the manakins (Aves:  
634 Passeriformes: Pipridae), with a new classification and the description of a new genus.  
635 *Molecular Phylogenetics and Evolution*, 69:796-804.

636 Oliveira U, Vasconcelos MF, Santos AJ. 2017. Biogeography of Amazon birds: rivers limit  
637 species composition, but not areas of endemism. *Scientific Reports*, 7:2992.

638 Paradis E. 2010. pegas: an R package for population genetics with an integrated-modular  
639 approach. *Bioinformatics*, 26:419-420.

640 Petkova D, Novembre J, Stephens M. 2015. Visualizing spatial population structure with  
641 estimated effective migration surfaces. *Nature Genetics*, 48:94.

642 R\_Core\_Team. 2018. R: A language and environment for statistical computing.

643 Revell LJ. 2012. Phytools: An R package for phylogenetic comparative biology (and other  
644 things). *Methods in Ecology and Evolution*, 3:217-223.

645 Santorelli S, Magnusson WE, Deus CP. 2018. Most species are not limited by an Amazonian  
646 river postulated to be a border between endemism areas. *Scientific Reports*, 8:2294.

647 Schmidt HA, Minh BQ, von Haeseler A, Nguyen L-T. 2014. IQ-TREE: A Fast and Effective  
648 Stochastic Algorithm for Estimating Maximum-Likelihood Phylogenies. *Molecular  
649 Biology and Evolution*, 32:268-274.

650 Smith BT, McCormack JE, Cuervo AM, Hickerson MJ, Aleixo A, Cadena CD, Perez-Eman J,  
651 Burney CW, Xie X, Harvey MG, Faircloth BC, Glenn TC, Derryberry EP, Prejean J,  
652 Fields S, Brumfield RT. 2014. The drivers of tropical speciation. *Nature*, 515:406-409.

653 Standley DM, Katoh K. 2013. MAFFT Multiple Sequence Alignment Software Version 7:  
654 Improvements in Performance and Usability. *Molecular Biology and Evolution*, 30:772-  
655 780.

656 Trifinopoulos J, Nguyen L-T, Minh BQ, von Haeseler A. 2016. W-IQ-TREE: a fast online  
657 phylogenetic tool for maximum likelihood analysis. *Nucleic Acids Research*, 44:W232-  
658 W235.

659 Wahlund S. 1928. ZUSAMMENSETZUNG VON POPULATIONEN UND  
660 KORRELATIONSERSCHEINUNGEN VOM STANDPUNKT DER  
661 VERERBUNGSLEHRE AUS BETRACHTET. *Hereditas*, 11:65-106.

662 Weir BS, Cockerham CC. 1984. ESTIMATING F-STATISTICS FOR THE ANALYSIS OF  
663 POPULATION STRUCTURE. *Evolution*, 38:1358-1370.

664

## **Supplementary Figures and Tables**

**Supplementary Table 1. Specimen data table (separate file)**

**Supplementary Table 2a. Results from Mantel tests**

Supplementary Table 2a.

| Region                            | locality code | mantel r | two-tailed p | lower 2.5% limit | upper 97.5% limit | log.d | perm significant (p < 0.001) |
|-----------------------------------|---------------|----------|--------------|------------------|-------------------|-------|------------------------------|
| Full dataset                      |               | 0.748    | 0.0001       | 0.729            | 0.763             | F     | 10000 *                      |
| Central America - Costa Rica      | CACR          | 0.459    | 0.2551       | 0.017            | 1.000             | F     | 10000 -                      |
| Central America - Panama          | CAPA          | 0.694    | 0.1019       | 0.021            | 0.921             | F     | 10000 -                      |
| North Andean – Marañón            | CAMA          | NA       | NA           | NA               | NA                | F     | 10000 -                      |
| South Andean Peru (North)         | CPN           | -0.261   | 1            | -0.261           | -0.261            | F     | 10000 -                      |
| South Andean Peru (South)         | CPS           | 0.816    | 0.0993       | 0.618            | 0.998             | F     | 10000 -                      |
| weakly resolved Guiana Shield     | GS            | 0.099    | 0.0947       | 0.058            | 0.134             | F     | 10000 -                      |
| unresolved Jaú                    | GSIMERI       | 0.096    | 0.243        | 0.043            | 0.166             | F     | 10000 -                      |
| weakly resolved eastern Napo      | GNAPO         | 0.313    | 0.0513       | 0.177            | 0.560             | F     | 10000 -                      |
| weakly resolved Suriname + Amapá  | GSSR          | 0.069    | 0.2483       | 0.032            | 0.121             | F     | 10000 -                      |
| Western Napo introgressed lineage | PH            | 0.508    | 0.017        | 0.340            | 0.754             | F     | 10000 -                      |
| Western Inambari endemic          | INAMBARI      | 0.608    | 0.001        | 0.382            | 0.848             | F     | 10000 *                      |
| Eastern Inambari endemic          | INAMBARIE     | 0.004    | 0.981        | -0.196           | 0.244             | F     | 10000 -                      |
| Rondonia endemic                  | RONDONIA      | NA       | NA           | NA               | NA                | F     | 10000 -                      |
| Tapajós endemic                   | TAPAJOS       | 0.250    | 0.0148       | 0.182            | 0.313             | F     | 10000 -                      |
| Xingu endemic                     | XINGU         | 0.079    | 0.8572       | -0.170           | 0.275             | F     | 10000 -                      |
| Atlantic Forest – Bahia           | AFBAHIA       | 0.484    | 0.0173       | 0.173            | 0.804             | F     | 10000 -                      |
| Atlantic Forest – Espírito Santo  | AFES          | NA       | NA           | NA               | NA                | F     | 10000 -                      |
| Atlantic Forest – Rio             | AFRIO         | 0.701    | 0.0007       | 0.615            | 0.782             | F     | 10000 *                      |

  

| Region                            | locality code | mantel r | two-tailed p | lower 2.5% limit | upper 97.5% limit | log.d | perm significant (p < 0.001) |
|-----------------------------------|---------------|----------|--------------|------------------|-------------------|-------|------------------------------|
| Full dataset                      |               | 0.391    | 0.0001       | 0.379            | 0.401             | T     | 10000 *                      |
| Central America - Costa Rica      | CACR          | 0.459    | 0.253        | 0.017            | 1.000             | T     | 10000 -                      |
| Central America - Panama          | CAPA          | 0.519    | 0.2532       | 0.021            | 0.919             | T     | 10000 -                      |
| North Andean – Marañón            | CAMA          | NA       | NA           | NA               | NA                | T     | 10000 -                      |
| South Andean Peru (North)         | CPN           | -0.261   | 1            | -0.261           | -0.261            | T     | 10000 -                      |
| South Andean Peru (South)         | CPS           | 0.810    | 0.032        | 0.669            | 0.998             | T     | 10000 -                      |
| weakly resolved Guiana Shield     | GS            | 0.091    | 0.0022       | 0.063            | 0.119             | T     | 10000 -                      |
| unresolved Jaú                    | GSIMERI       | 0.536    | 0.0001       | 0.319            | 0.684             | T     | 10000 *                      |
| weakly resolved eastern Napo      | GNAPO         | 0.313    | 0.0479       | 0.161            | 0.574             | T     | 10000 -                      |
| weakly resolved Suriname + Amapá  | GSSR          | 0.065    | 0.1054       | 0.026            | 0.117             | T     | 10000 -                      |
| Western Napo introgressed lineage | PH            | 0.248    | 0.091        | 0.102            | 0.407             | T     | 10000 -                      |
| Western Inambari endemic          | INAMBARI      | 0.714    | 0.0008       | 0.499            | 0.952             | T     | 10000 *                      |
| Eastern Inambari endemic          | INAMBARIE     | -0.004   | 0.9801       | -0.304           | 0.213             | T     | 10000 -                      |
| Rondonia endemic                  | RONDONIA      | NA       | NA           | NA               | NA                | T     | 10000 -                      |
| Tapajós endemic                   | TAPAJOS       | 0.247    | 0.0011       | 0.115            | 0.353             | T     | 10000 -                      |
| Xingu endemic                     | XINGU         | 0.079    | 0.854        | -0.112           | 0.275             | T     | 10000 -                      |
| Atlantic Forest – Bahia           | AFBAHIA       | 0.481    | 0.0693       | 0.298            | 0.885             | T     | 10000 -                      |
| Atlantic Forest – Espírito Santo  | AFES          | NA       | NA           | NA               | NA                | T     | 10000 -                      |
| Atlantic Forest – Rio             | AFRIO         | 0.747    | 0.0012       | 0.676            | 0.912             | T     | 10000 -                      |

**Supplementary Table 2b. Results from partial Mantel tests**

Supplementary Table 2b.

| <b>Approximate Barrier</b>         | <b>Comparison (populations)</b>                  | <b>partial mantel r</b> | <b>two-tailed p</b> | <b>lower 2.5% limit</b> | <b>upper 97.5% limit</b> | <b>log.d</b> | <b>perm</b> | <b>significant (p &lt; 0.001)</b> |
|------------------------------------|--------------------------------------------------|-------------------------|---------------------|-------------------------|--------------------------|--------------|-------------|-----------------------------------|
| Cordillera de Talamanca            | Costa Rica vs Panama                             | -0.159                  | 0.2972              | -0.267                  | 0.155                    | F            | 10000       | -                                 |
| Andes (1)                          | Central America vs Marañón                       | -0.591                  | 0.0967              | -0.729                  | -0.454                   | F            | 10000       | -                                 |
| Andes (2)                          | Central America vs (Marañón + South Andean Peru) | 0.041                   | 0.4030              | -0.248                  | 0.137                    | F            | 10000       | -                                 |
| Andes (3)                          | Central America vs (Everything else)             | -0.267                  | 0.0001              | -0.295                  | -0.229                   | F            | 10000       | *                                 |
| Rio Ucayali                        | South Andean Peru vs Inambari                    | -0.906                  | 0.0001              | -0.940                  | -0.872                   | F            | 10000       | *                                 |
| Eastern Marañón + Hauallaga Rivers | Introgressed western Napo vs Inambari            | -0.896                  | 0.0001              | -0.917                  | -0.878                   | F            | 10000       | *                                 |
| Rio Putumayo                       | Introgressed western Napo vs eastern Napo        | -0.744                  | 0.0001              | -0.826                  | -0.702                   | F            | 10000       | *                                 |
| Rio Purus                          | Western Inambari vs eastern Inambari             | -0.605                  | 0.0001              | -0.720                  | -0.044                   | F            | 10000       | *                                 |
| Rio Madeira                        | Eastern Inambari vs Rondônia                     | -0.550                  | 0.0001              | -0.697                  | -0.129                   | F            | 10000       | *                                 |
| Rio Tapajós                        | Rondônia vs Tapajós                              | -0.175                  | 0.0441              | -0.233                  | -0.114                   | F            | 10000       | -                                 |
| Rio Xingu                          | Tapajós vs Xingu                                 | -0.518                  | 0.0004              | -0.383                  | -0.240                   | F            | 10000       | *                                 |
| Cerrado (1)                        | All pooled pops vs pooled Atlantic Forest        | -0.183                  | 0.0008              | -0.229                  | -0.112                   | F            | 10000       | *                                 |
| Cerrado (2)                        | Xingu vs Bahia                                   | -0.565                  | 0.0001              | -0.609                  | -0.434                   | F            | 10000       | *                                 |
| Rio Japurá                         | Eastern Napo vs Jaú                              | -0.151                  | 0.0146              | -0.297                  | -0.109                   | F            | 10000       | -                                 |
| Rio Negro                          | Jaú vs central Guiana Shield                     | -0.053                  | 0.5107              | -0.088                  | -0.012                   | F            | 10000       | -                                 |
| Rio Essequibo                      | central Guiana Shield vs eastern Guiana shield   | -0.350                  | 0.0001              | -0.391                  | 0.060                    | F            | 10000       | *                                 |
| Rio Amazonas                       | All pooled lowland N vs all pooled lowland S     | -0.912                  | 0.0001              | -0.918                  | -0.907                   | F            | 10000       | *                                 |
| <b>Approximate Barrier</b>         | <b>Comparison (populations)</b>                  | <b>partial mantel r</b> | <b>two-tailed p</b> | <b>lower 2.5% limit</b> | <b>upper 97.5% limit</b> | <b>log.d</b> | <b>perm</b> | <b>significant (p &lt; 0.001)</b> |
| Cordillera de Talamanca            | Costa Rica vs Panama                             | -0.744                  | 0.0001              | -0.802                  | -0.693                   | T            | 10000       | *                                 |
| Andes (1)                          | Central America vs Marañón                       | -0.996                  | 0.0001              | -0.997                  | -0.963                   | T            | 10000       | *                                 |
| Andes (2)                          | Central America vs (Marañón + South Andean Peru) | -0.829                  | 0.0001              | -0.942                  | -0.781                   | T            | 10000       | *                                 |
| Andes (3)                          | Central America vs (Everything else)             | -0.464                  | 0.0001              | -0.495                  | -0.420                   | T            | 10000       | *                                 |
| Rio Ucayali                        | South Andean Peru vs Inambari                    | -0.910                  | 0.0001              | -0.938                  | -0.883                   | T            | 10000       | *                                 |
| Rio Marañón + Solimões             | Introgressed western Napo vs Inambari            | -0.880                  | 0.0001              | -0.900                  | -0.862                   | T            | 10000       | *                                 |
| Rio Putumayo                       | Introgressed western Napo vs eastern Napo        | -0.900                  | 0.0001              | -0.941                  | -0.884                   | T            | 10000       | *                                 |
| Rio Purus                          | Western Inambari vs eastern Inambari             | -0.833                  | 0.0001              | -0.863                  | -0.811                   | T            | 10000       | *                                 |
| Rio Madeira                        | Eastern Inambari vs Rondônia                     | -0.751                  | 0.0001              | -0.814                  | -0.650                   | T            | 10000       | *                                 |
| Rio Tapajós                        | Rondônia vs Tapajós                              | -0.316                  | 0.0001              | -0.388                  | -0.211                   | T            | 10000       | *                                 |
| Rio Xingu                          | Tapajós vs Xingu                                 | -0.703                  | 0.0001              | -0.754                  | -0.655                   | T            | 10000       | *                                 |
| Cerrado (1)                        | All pooled pops vs pooled Atlantic Forest        | -0.721                  | 0.0001              | -0.745                  | -0.702                   | T            | 10000       | *                                 |
| Cerrado (2)                        | Xingu vs Bahia                                   | -0.954                  | 0.0001              | -0.952                  | 0.070                    | T            | 10000       | *                                 |
| Rio Japurá                         | Eastern Napo vs Jaú                              | -0.399                  | 0.0001              | -0.490                  | -0.329                   | T            | 10000       | *                                 |
| Rio Negro                          | Jaú vs central Guiana Shield                     | -0.036                  | 0.4825              | -0.069                  | 0.001                    | T            | 10000       | -                                 |
| Rio Essequibo                      | central Guiana Shield vs eastern Guiana shield   | -0.470                  | 0.0001              | -0.503                  | -0.444                   | T            | 10000       | *                                 |
| Rio Amazonas                       | All pooled lowland N vs all pooled lowland S     | -0.915                  | 0.0001              | -0.921                  | -0.911                   | T            | 10000       | *                                 |



**Supplementary Table 3: Song measures (separate file)**

**Supplementary Table 4: Song recording metadata (separate file)**

**Supplementary Table 5: G-PhoCS parameters**

**Supplementary Table 5a,  $\theta$ : effective population size**

|                       | Western Napo | Eastern Napo | Inambari  | MRC Western Napo, Inambari | MRC Inambari, Eastern Napo |
|-----------------------|--------------|--------------|-----------|----------------------------|----------------------------|
| median                | 4950840      | 2807467.5    | 2797062.5 | 5356300                    | 1429540                    |
| 95% HPD Interval LOW  | 4527457.5    | 2498760      | 2566870   | 4658055                    | 1352200                    |
| 95% HPD Interval HIGH | 5378937.5    | 3132990      | 3044770   | 6047630                    | 1512647.5                  |

**Supplementary Table 5b,  $\tau$ : splitting time in generations**

|                       | Western Napo, Inambari | Eastern Napo |
|-----------------------|------------------------|--------------|
| median                | 484600                 | 1025420      |
| 95% HPD Interval LOW  | 442610                 | 954030       |
| 95% HPD Interval HIGH | 532120                 | 1099450      |

**Supplementary Table 5c,  $m$  : migration rate (migrants per generation)**

|                       | Eastern Napo to Inambari | Western Napo to Eastern Napo | Inambari to Western Napo | Western Napo to Inambari |
|-----------------------|--------------------------|------------------------------|--------------------------|--------------------------|
| median                | 0.0663                   | 0.4196                       | 1.7508                   | 0.3671                   |
| 95% HPD Interval LOW  | 0.0000                   | 0.2670                       | 1.0470                   | 0.0000                   |
| 95% HPD Interval HIGH | 0.1763                   | 0.6109                       | 2.5872                   | 0.8184                   |

**Supplementary Figure 1. GBIF occurrence records.**

Here, we plot all GBIF occurrence records at the time of writing (in black) with our sampling localities (in red). The BirdLife approximate range map is shown in light green, and our modifications to this map are shown in pink to account for major inaccuracies in the available genus range map. This figure is provided primarily to illustrate that the BirdLife range map is inaccurate in the western Amazon, in Loreto, Peru, where our analyses detect an introgressed hybrid lineage.

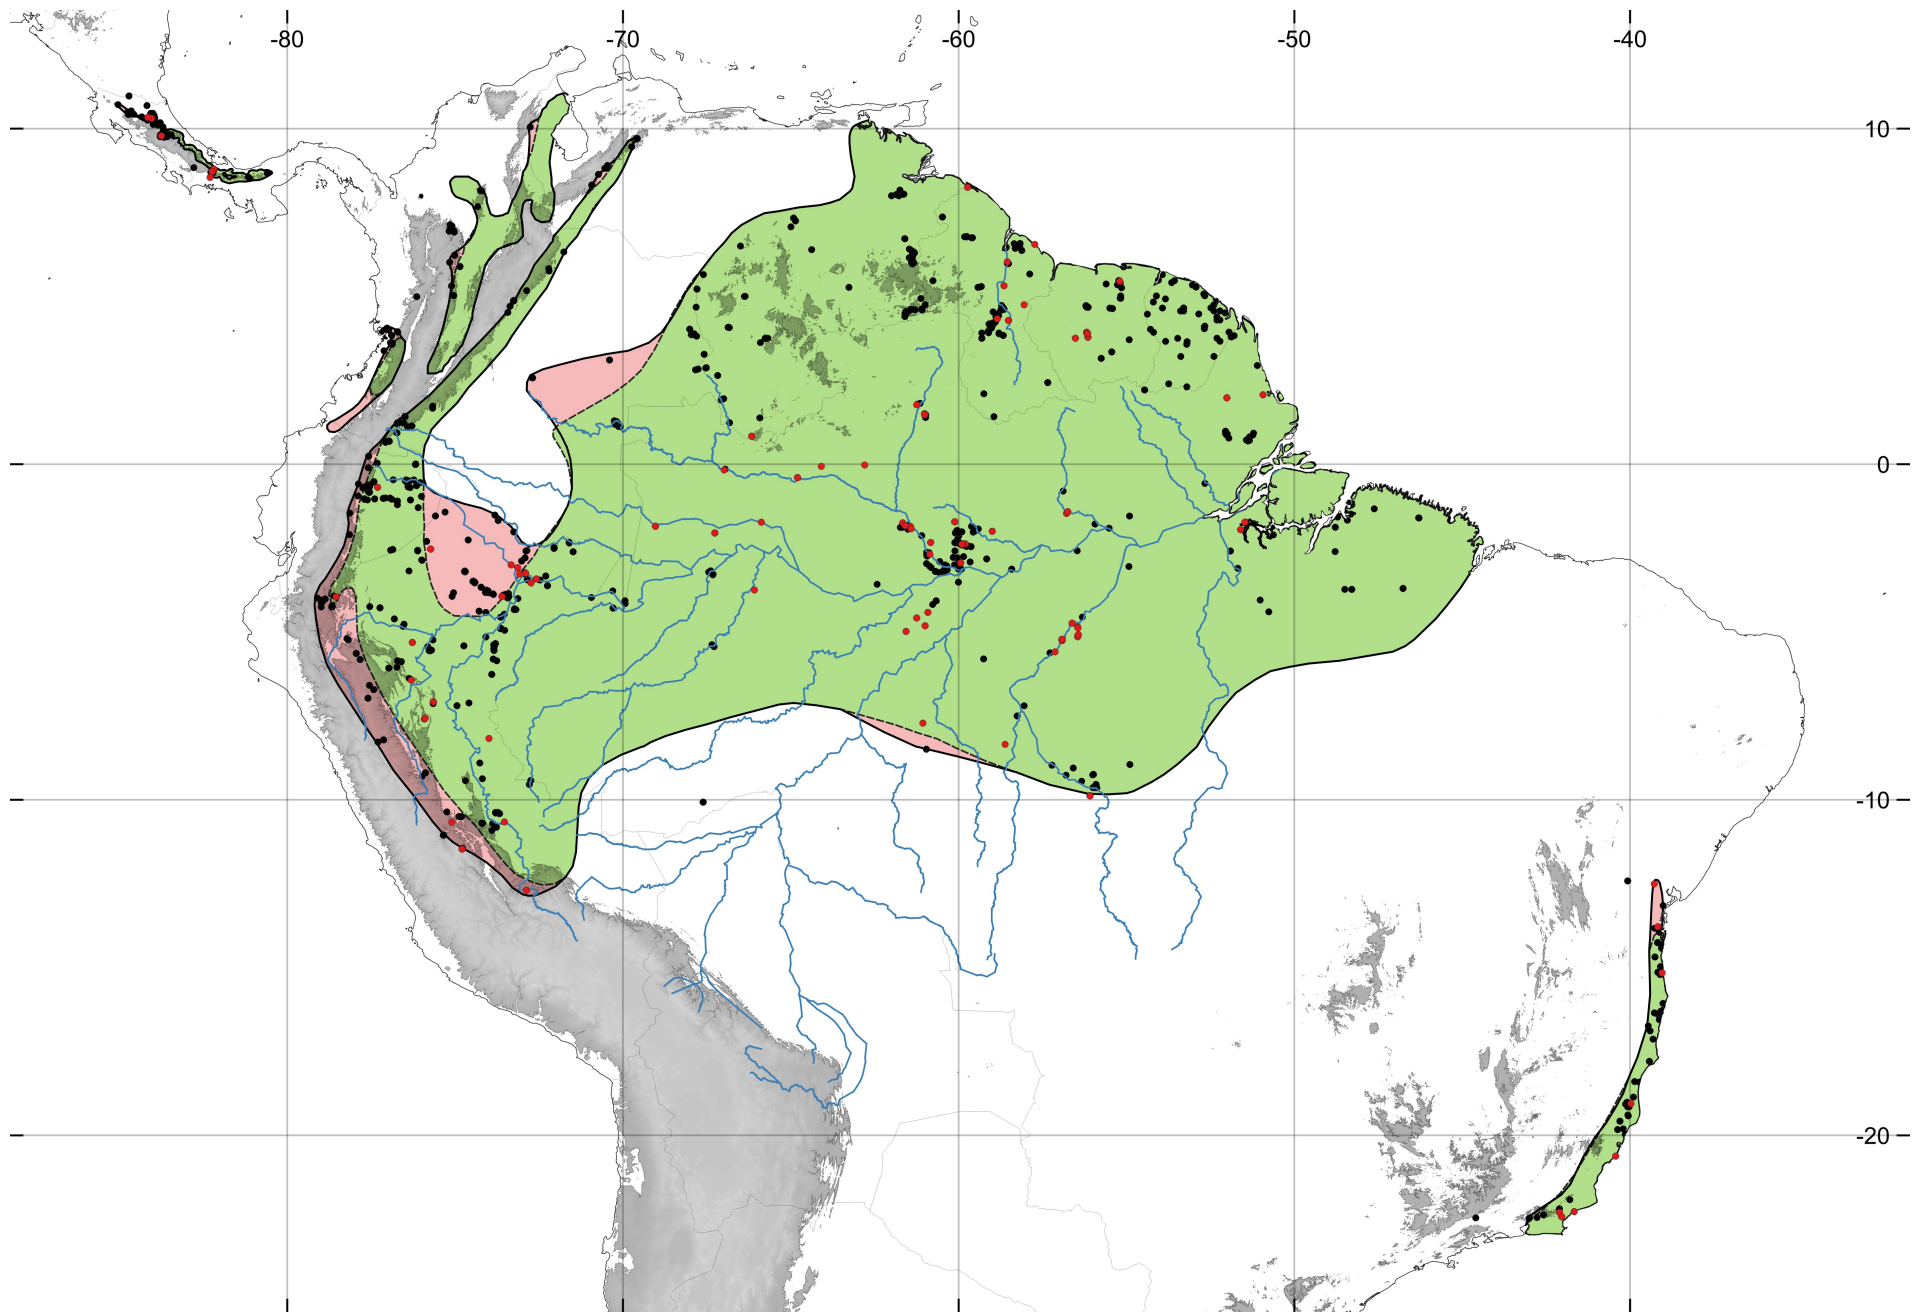

### **Supplementary Figure 2. K-means clustering of SNP data**

In this figure, the PCoA projections of the SNP data are indicated on the top row, with minimum convex hulls (minimum implied range) and plotting symbols indicating the optimal K-means K5 clustering solution. PCoA explained 13-17% of the variance in the SNP data on the first two axes, and K-means clustering assignments derived from each dataset recovers nearly identical population assignments. Clustering of dataset 1 (1960 SNPs, 0.05 MAF) was identical to the clustering solutions for datasets 2 and 3, except for the assignment of one important individual (5444.PE.MAR), which links Central American lineages to our San Martín specimen in North Andean, Peru. Plotting symbols and colored convex hulls reflect cluster assignment (Hull colors are synonymous only across plotted columns, see supplementary R script). For datasets 2 (2581 SNPs) and 3 (5099 SNPs), K-means clustering detected the following groups: all Guiana Shield (Clade D in Figure 3), Atlantic Forest (Clade C7), South Andean Peru (Clade B), Southern Amazon including the western Napo population (Clade C + Clade E in Figure 3), and Central America (Clade A1 in Figure 3).

dataset1 PCoA kmeans K=5

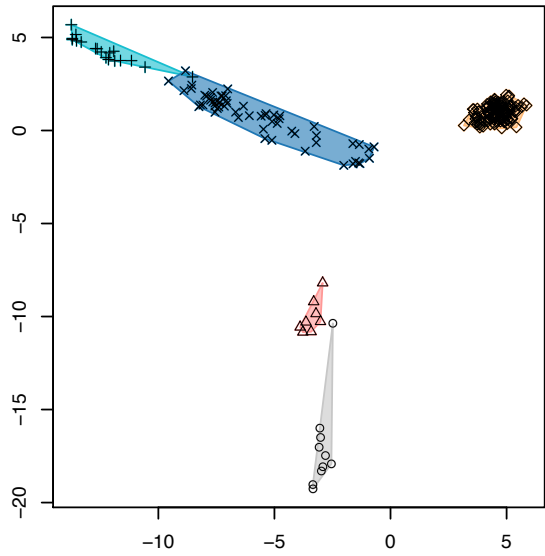

These two components explain 17% of the point variability

dataset2 PCoA kmeans K=5

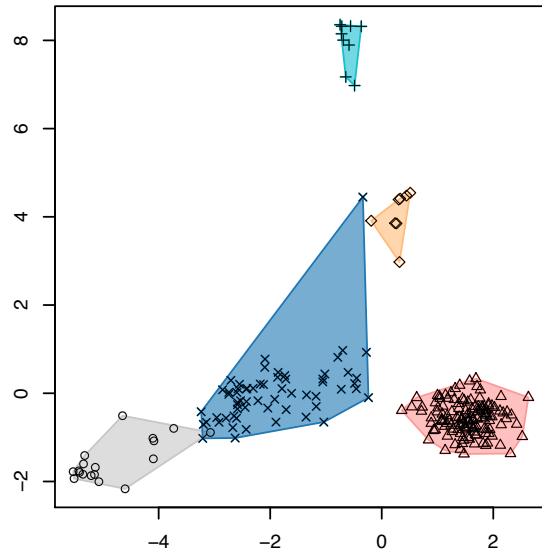

These two components explain 13% of the point variability

dataset3, PCoA kmeans K=5

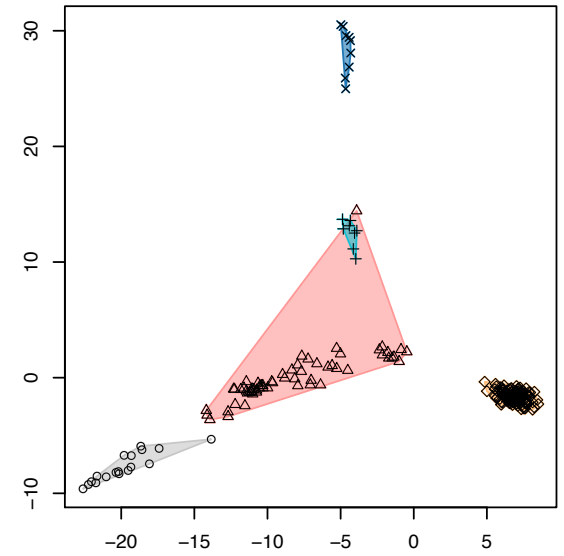

These two components explain 15% of the point variability

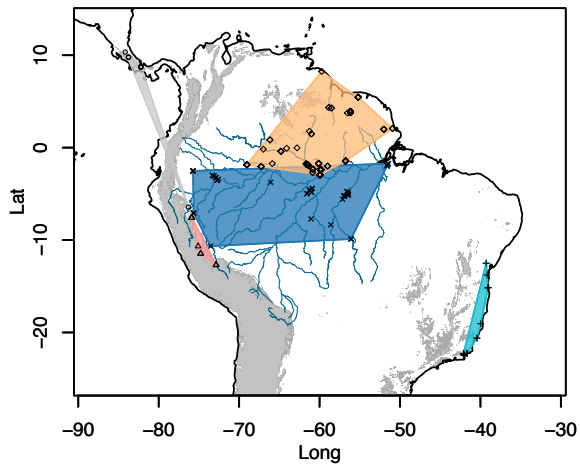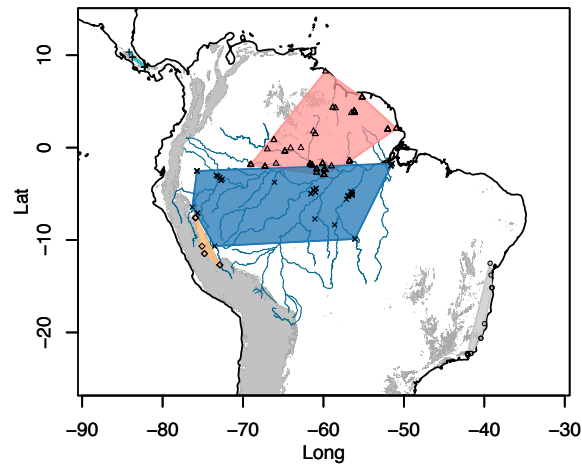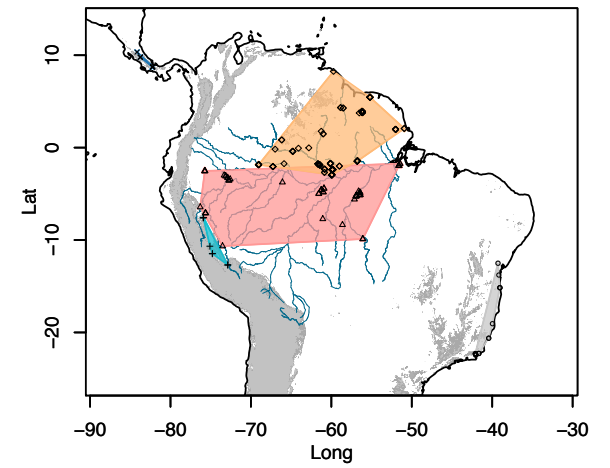



**Supplementary Figure 3 – log likelihoods of STRUCTURE runs**

Summarized log likelihood values across STRUCTURE runs for each value of K, with a plateau starting at  $K \sim 5$ , and variance across runs increasing dramatically after K10.

L(K) (mean +- SD)

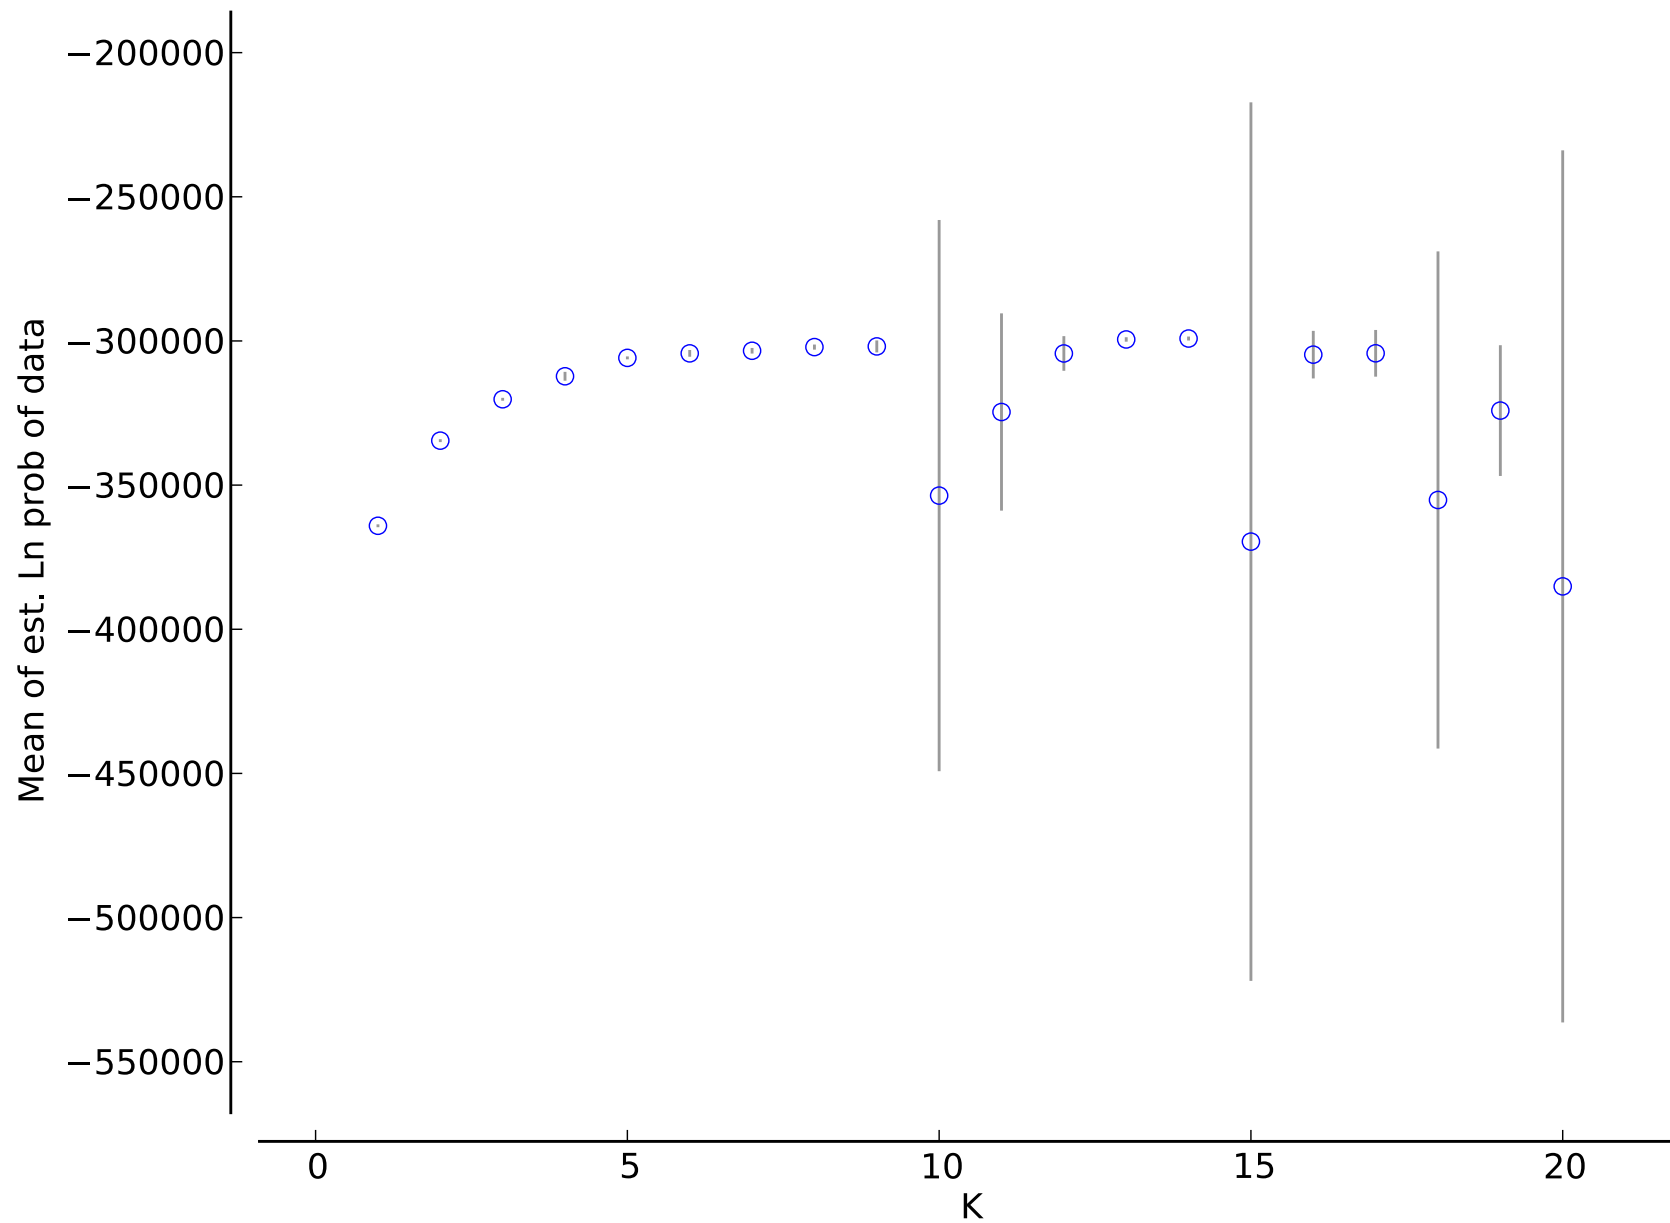

#### **Supplementary Figure 4. STRUCTURE output for k2-10**

Full STRUCTURE output for dataset 1, indicating population assignments and admixture for K2-10. The likelihood of each evaluated number of K clusters from 1:20 plateaued at K = 5, with the standard deviation across runs increasing rapidly after this point (Supplementary Figure 3). See results text for descriptions of these analyses. At K2, the first partition divides the dataset into broad northern and southern Amazonian groups, with all Andean and Central American samples assigned to predominantly southern Amazonian genetic provenance, with some northern admixture. Western Napo individuals are detected as an approximately even mixture of northern and southern Amazonian genomes. At K5, the five identified clusters broadly correspond to wide biogeographic Amazonian regions which encompass multiple areas of endemism (see text). For each barplot, colors are sampled randomly from a 20 color viridis color palette for each run (i.e., they are not synonymous across values of K, see supplementary R script). The tree below corresponds to the RAxML result using the 50% haplotype dataset, with tip labels and colors indicating group membership to one of eighteen population-areas. Colored tip labels correspond to clade label colors in Figures 3 and 4. At higher K, the broad-scale population assignments inferred at K5 are similar, however additional admixture components are inferred for most groups. The introgressed western Napo clade is eventually placed into its own cluster at K9-10.

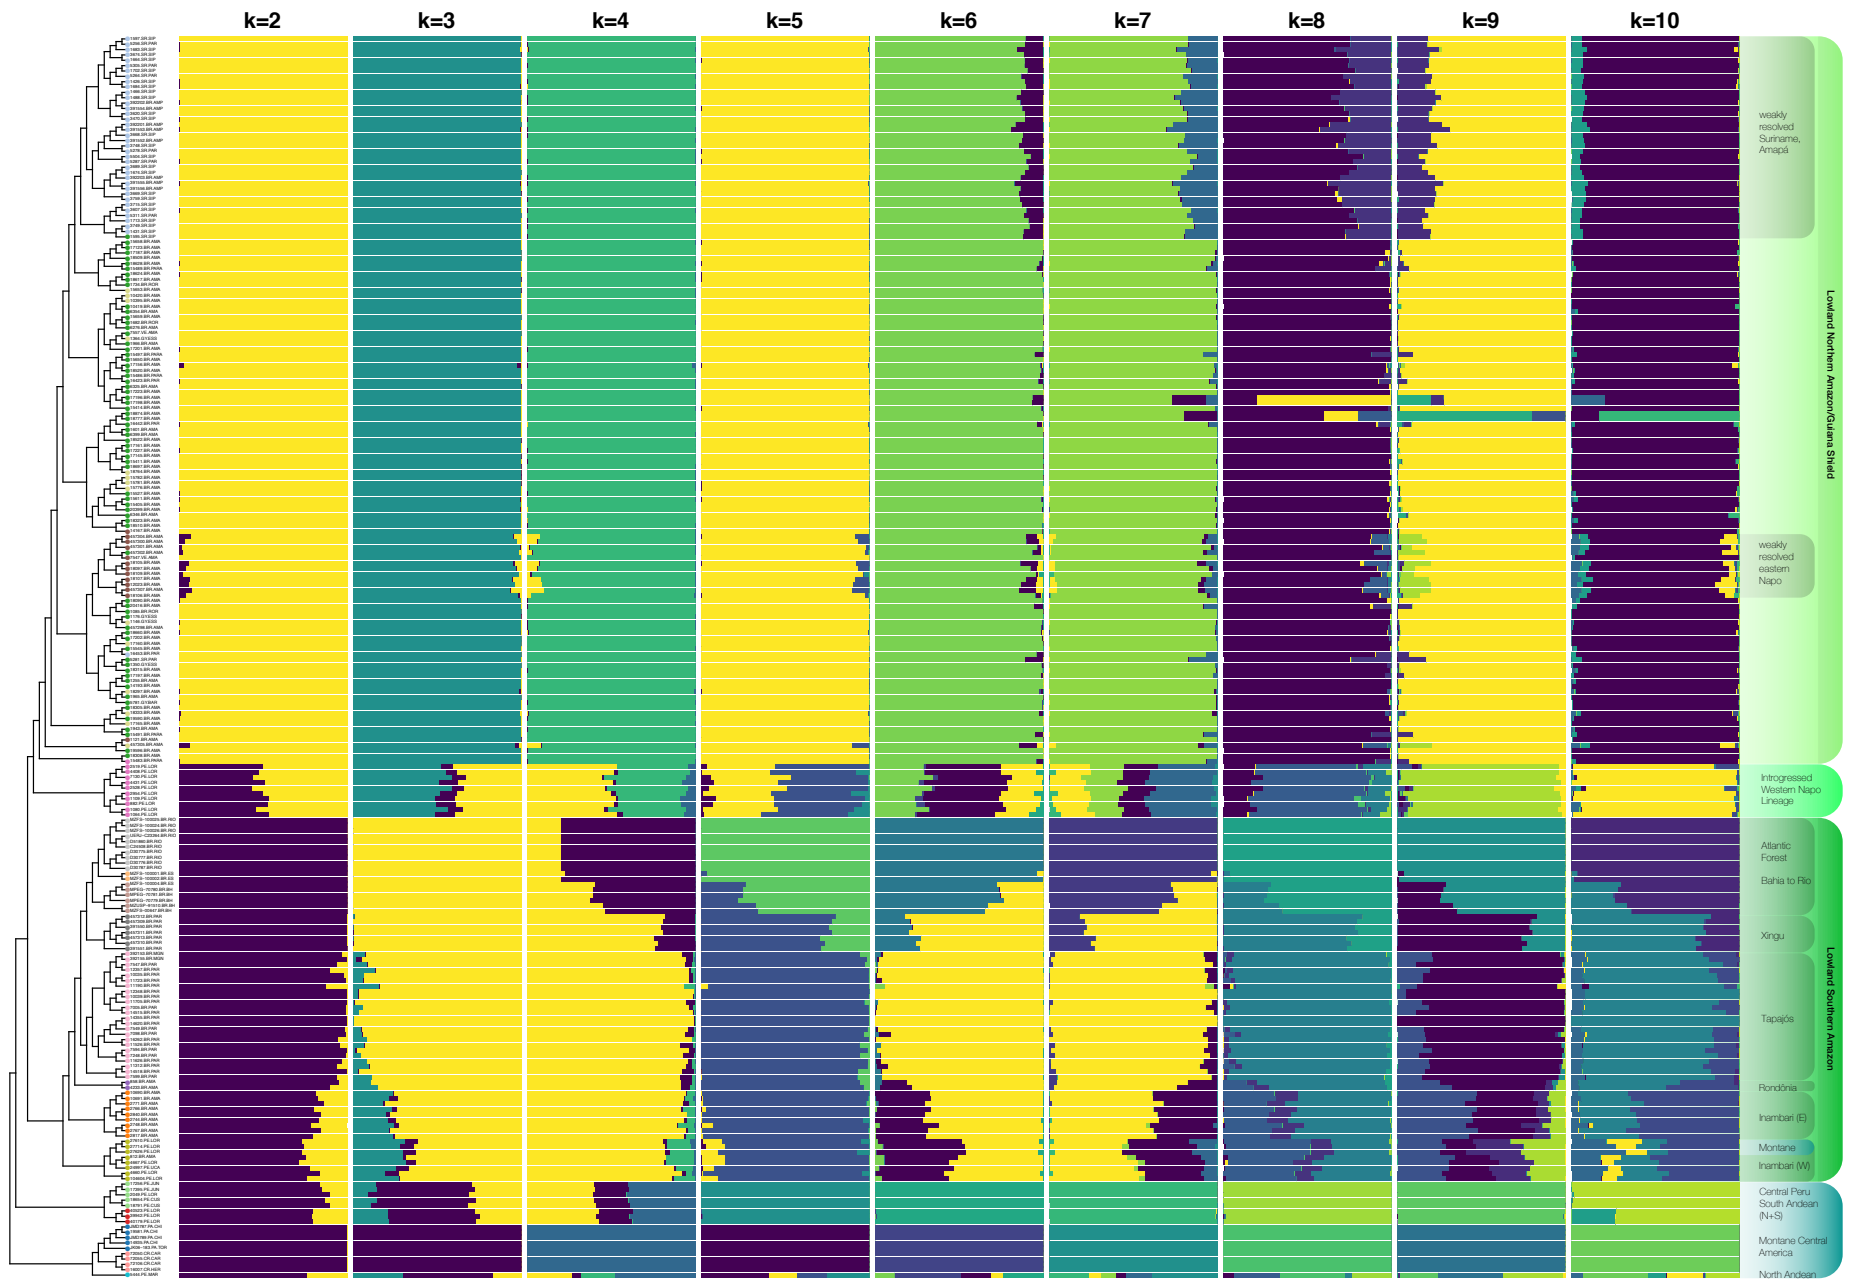

### **Supplementary Figure 5. fineRADstructure population assignment dendrogram**

Clustering dendrogram generated from fineRADstructure population assignment. Note: this is not a phylogenetic hypothesis, but rather, a clustering based on genomic similarity which considers data from the full co-ancestry matrix. Tip labels correspond to population codes used internally for R scripts and other analyses. Each of these codes has a 1:1 correspondence with the labeled localities in Figures 3 and 4:

CAMA: North Andean – San Martín, Peru

CACR: Central America - Costa Rica

CAPA: Central America - Panama

CPS: South Andean Peru (South)

CPN: South Andean Peru (North)

INAMBARI: Western Inambari endemic

INAMBARIE: Eastern Inambari endemic

RONDONIA: Rondônia endemic

TAPAJOS: Tapajós endemic

XINGU: Xingu endemic

AFBAHIA: Atlantic Forest – Bahia

AFES: Atlantic Forest – Espírito Santo

AFRIO: Atlantic Forest – Rio

PH (putative hybrid): Western Napo introgressed lineage

GSIMERI: unresolved Jaú

GSNAPO: weakly resolved eastern Napo

GS: weakly resolved Guiana Shield

GSSR: weakly resolved Suriname + Amapá

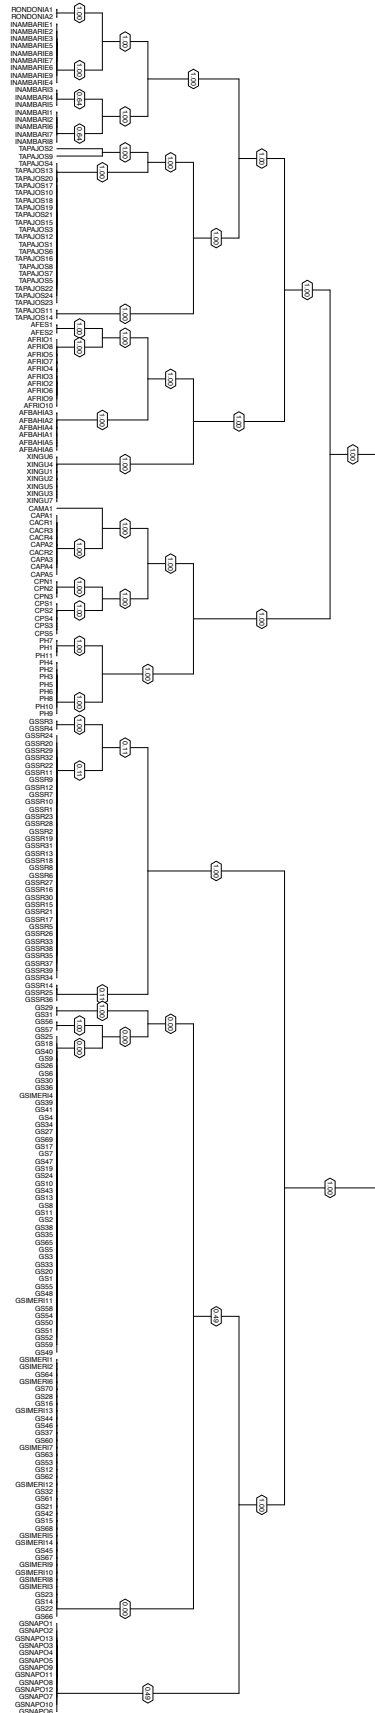

**Supplementary Figure 6. chromoPainter co-ancestry matrix**

The raw co-ancestry matrix from the full haplotype dataset, output from the fineRADstructure program. See Supplementary Figure 5 caption for descriptions of localities, matching those in Figure 3 and 4.

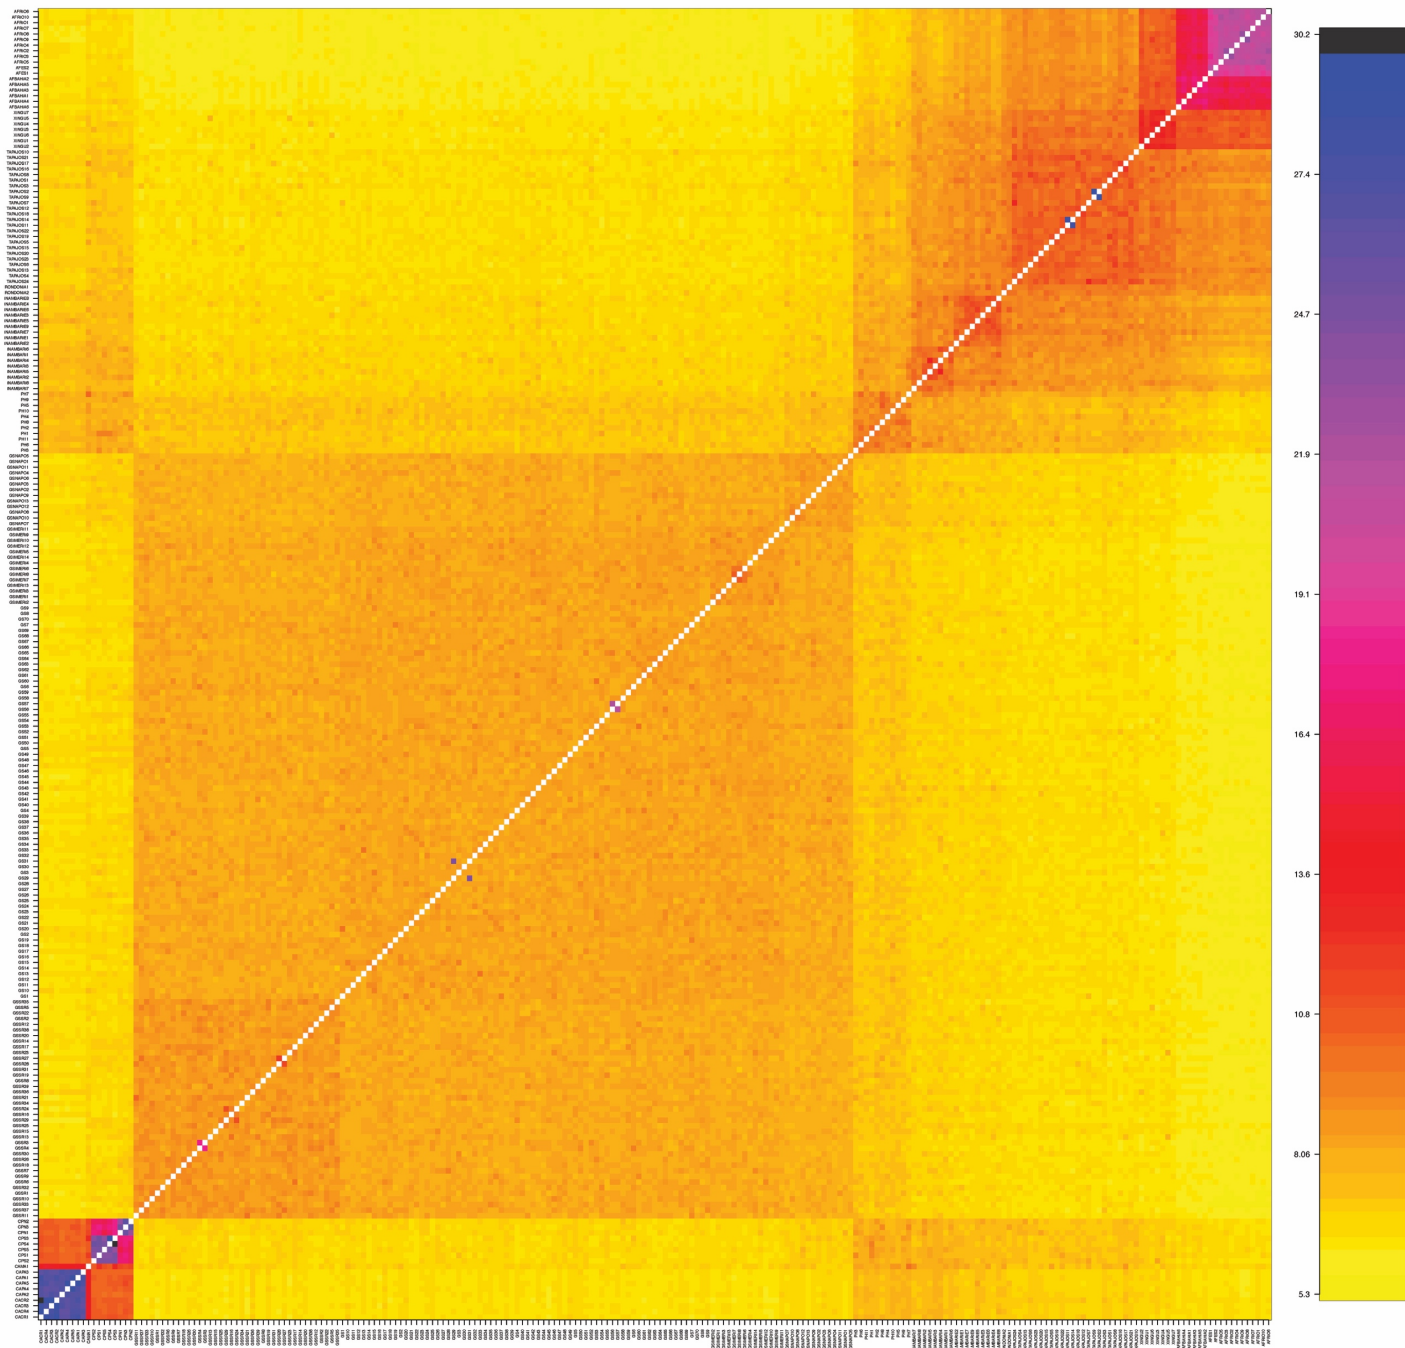



**Supplementary Figure 7. chromoPainter co-ancestry matrix**

The co-ancestry matrix from the full haplotype dataset, with values averaged across 18 focal population-areas. See Supplementary Figure 5 caption for descriptions of localities, matching those in Figure 3 and 4.



### **Supplementary Figure 8. K-means clustering of the full dataset co-ancestry matrix**

The Lawson et al. (2012) 'normalized PCA' approach provided with the fineRADstructure software captured 89% of the variance in the genetic data on the first four component axes (axis 1: 51.4%, axis 2, 24.9%, axis 3: 7.77%, axis 4: 4.94%). Thus, the co-ancestry matrix reflects substantially more information than standard PCoA/PCA of SNP data (Supplementary Figure 2). K-means phenetic clustering of the co-ancestry matrix more finely partitions the genetic data and explains a much greater proportion of the overall genetic variance than K-means clustering of the raw SNP data. Top row: normalized PCA projection of all individuals on the first two component axes, which capture ~76% of the point variability. Plotting symbols and colored convex hulls reflect cluster assignment. Hull colors are sampled randomly from a 20-color palette for each dataset (i.e., they are synonymous only across plot columns, see supplementary R script).

The leftmost pair of plots indicate membership to one of eighteen focal population-areas (i.e., not K-means assignments, see Supplemental Appendix text for justification) and are shown as minimum convex hulls in co-ancestry PC space (top) as well as projected onto a map (bottom, also shown in Figure 4). The center pair of plots shows the K-means clustering solution of the co-ancestry matrix when K is fixed to 18 (i.e., not based on BIC scores). Intriguingly, this produces a similar set of groups as shown in the leftmost pair.

In the rightmost two plots, we show the K-means optimum clustering solution of the co-ancestry matrix, with a BIC minimum plateau of ~8. This set of groups is generally concordant with hierarchical strata determined in earlier analyses, but also further partitioned relative to standard PC analyses on our SNP data. This clustering solution identified 1) Central America (Clade A2 in Figure 3), 2) South Andean Peru + San Martín (North Andean Peru); (Clade B + Clade A1 in Figure 3), 3) western Napo (Clade E in Figure 3), 4) Inambari + Rondônia (Clades C1, C3, and C4 in Figure 3), 5) Tapajós + Xingu (Clades C5 + C6 in Figure 3), 6) eastern Napo, Jaú, western Guiana shield, 7) Suriname + Amapá (Clade D in Figure 3) and 8) the Atlantic Forest (Clade C7), as separate groups which explain a majority of the variance in the data. Notably, this solution is entirely compatible with our phylogenetic hypothesis, except for the clustering of our single San Martín sample with geographically proximate Peruvian populations, rather than Central American populations (see discussion). This solution generally recapitulates subspecies boundaries (Figure 2).

coancestry matrix, 18 phylo-regions

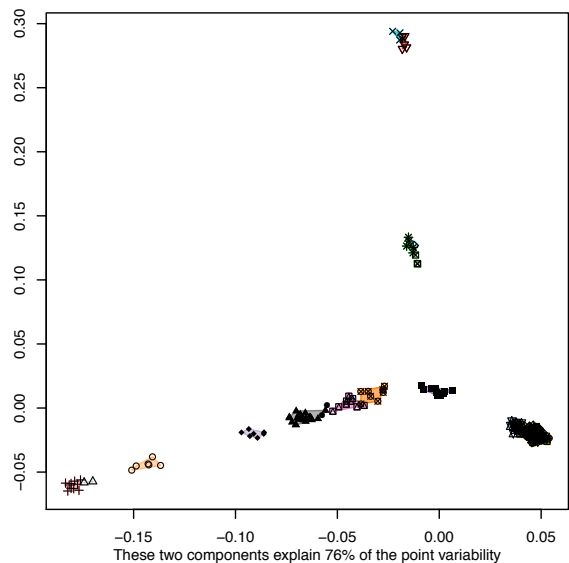

coancestry matrix, k=18 kmeans solution

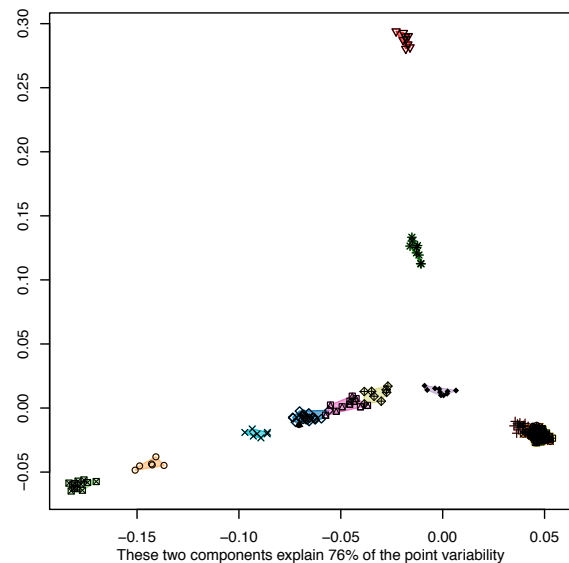

coancestry matrix, BIC min K=8 kmeans solution

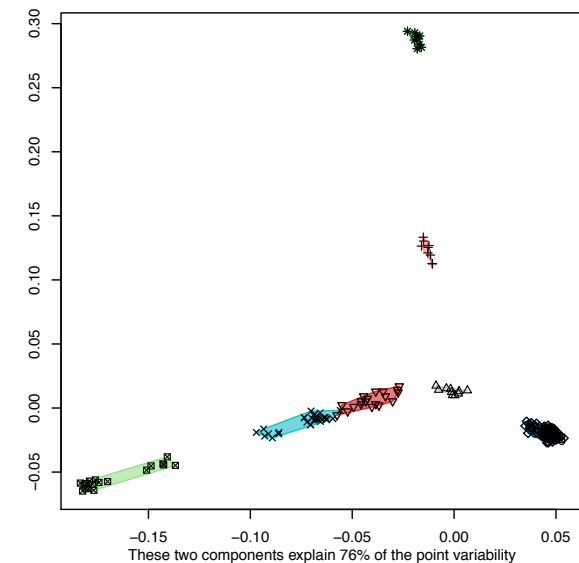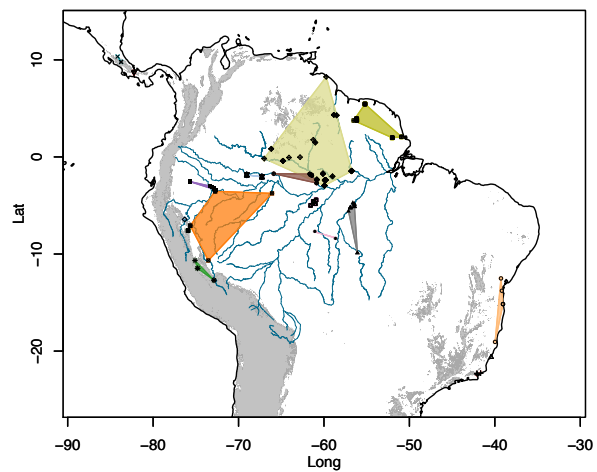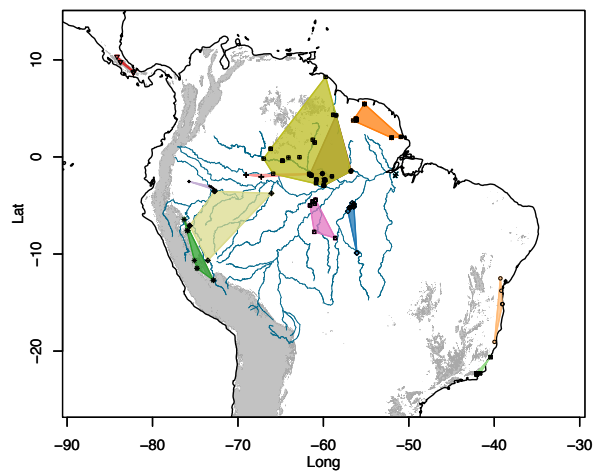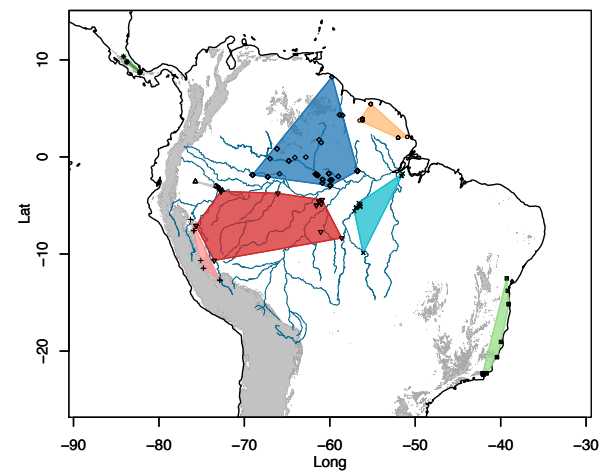

### **Supplementary Figure 9. Estimates of Inbreeding coefficients $F_{IS}$**

Most populations were detected to be significantly inbred ( $F_{IS} > 1$ ), with lower 95% confidence intervals  $> 0$ . Panamanian, Costa Rican, South Andean (North clade), Rondônia, and Espírito Santo clades had 95% confidence intervals which overlapped zero, and thus cannot be confidently inferred to have positive or negative  $F_{IS}$ . The simulated F1 (SIMF1) population however, did have significantly negative  $F_{IS}$ , as predicted. This pattern implies that the introgressed western Napo population, which was detected to have a significantly positive  $F_{IS}$ , is not likely to include recently introgressed individuals. The confidence intervals for eastern Napo, Jaú, Inambari and western Napo populations are generally overlapping, with similar means (mean of mean estimates  $\sim 0.17$ , SD of mean estimates  $\sim 0.02$ ). Locality codes below:

CAMA: North Andean – San Martín (North Andean Peru)

CACR: Central America - Costa Rica

CAPA: Central America - Panama

CPS: South Andean Peru (South)

CPN: South Andean Peru (North)

INAMBARI: Western Inambari endemic

INAMBARIE: Eastern Inambari endemic

RONDONIA: Rondônia endemic

TAPAJOS: Tapajós endemic

XINGU: Xingu endemic

AFBAHIA: Atlantic Forest – Bahia

AFES: Atlantic Forest – Espírito Santo

AFRIO: Atlantic Forest – Rio

PH (putative hybrid): Western Napo introgressed lineage

GSIMERI: unresolved Jaú

GSSAPO: weakly resolved eastern Napo

GS: weakly resolved Guiana Shield

GSSR: weakly resolved Suriname + Amapá

Bootstrapped Inbreeding Coefficient, Fis, dataset2

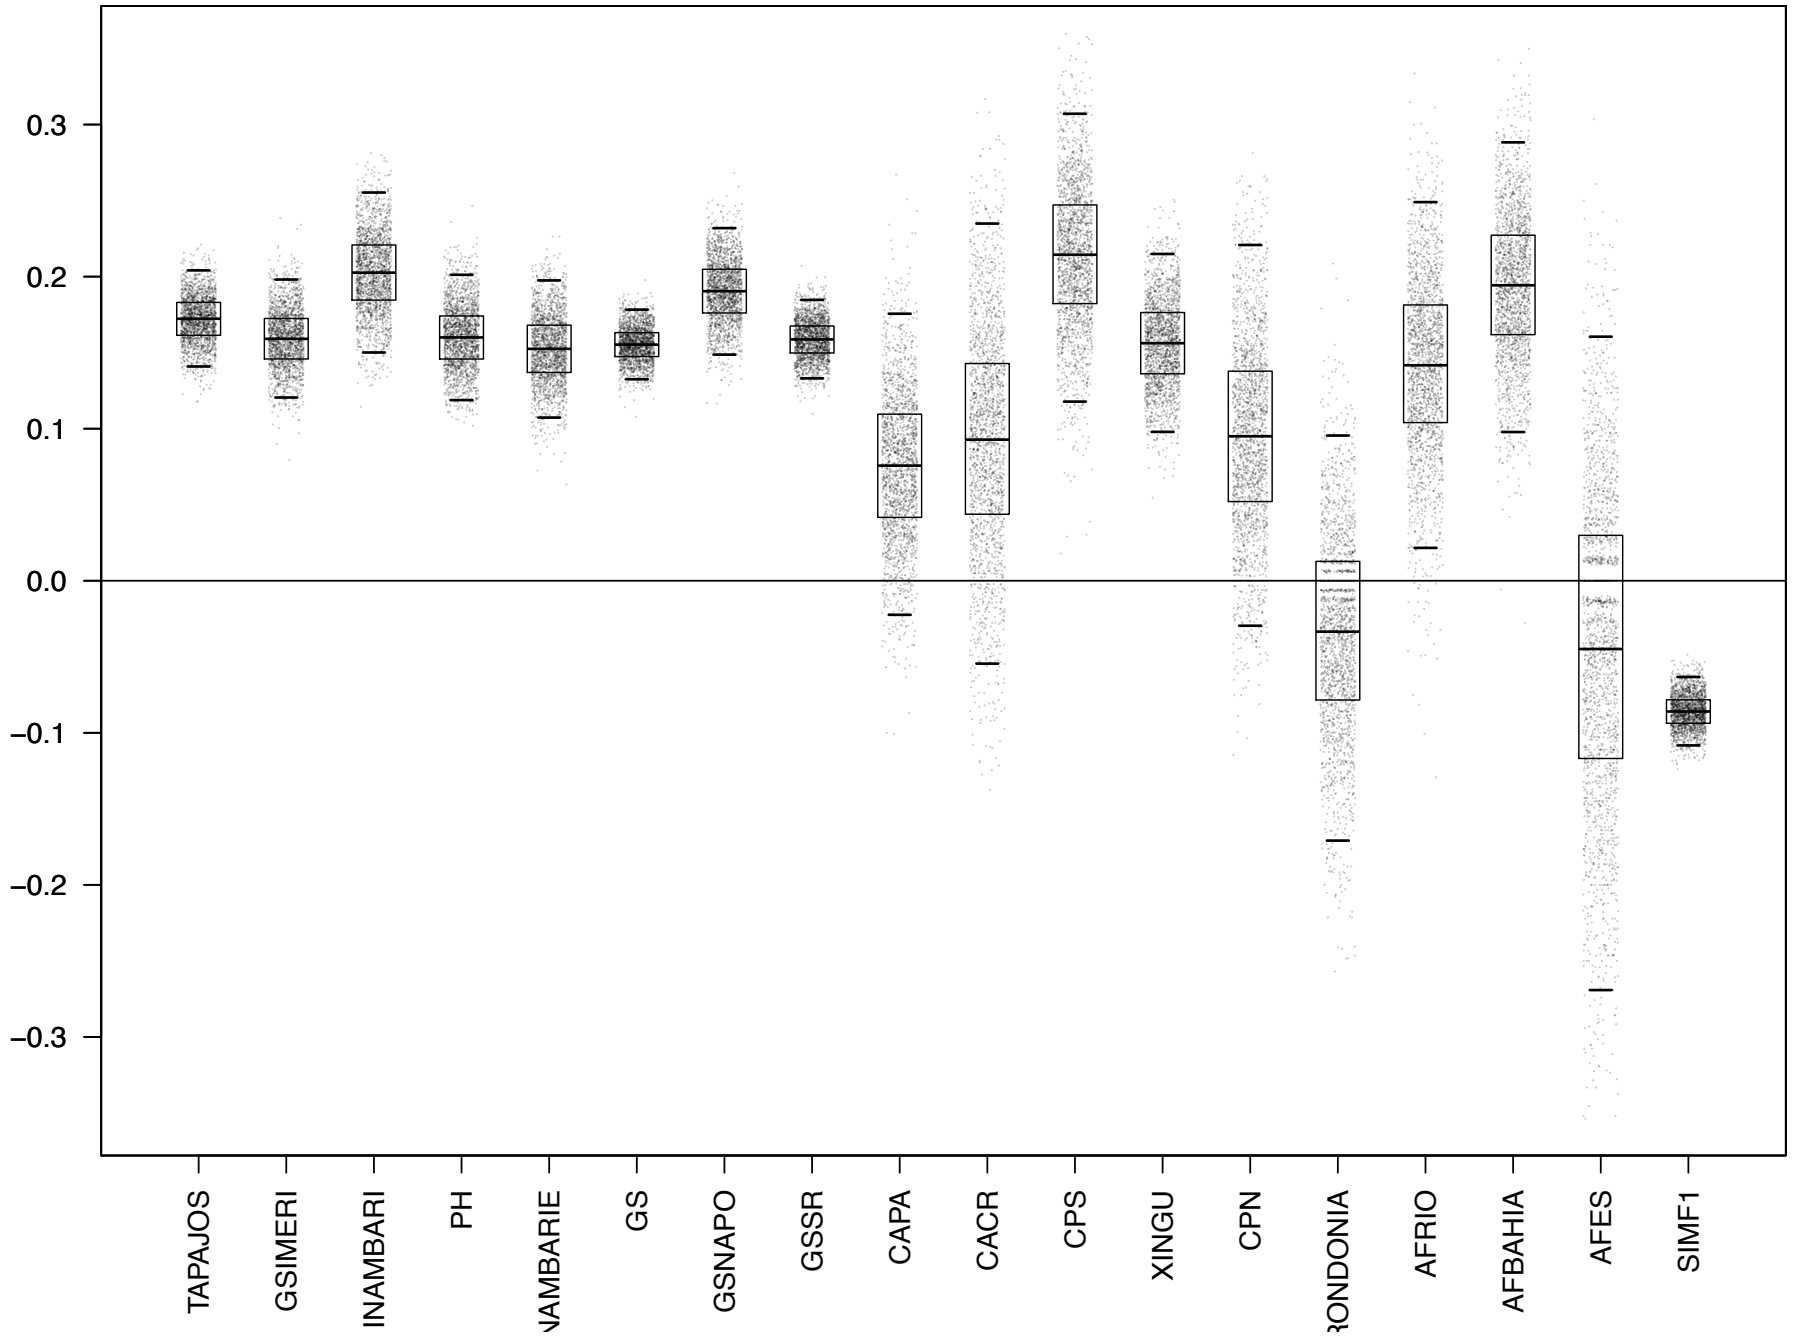

### **Supplementary Figure 10. Population pairwise $F_{st}$**

We estimated pairwise Weir and Cockerham's (Weir and Cockerham 1984)  $F_{st}$  among all 18 focal areas, and evaluated significance using 1000 bootstrapped datasets to estimate 95% confidence intervals using the 'assigner' R package (Gosselin et al. 2016). Here, we show these results plotted as a pairwise distance heatmap. Average pairwise  $F_{st}$  ranged from essentially undifferentiated ( $F_{st}$ : 0.0045, comparing GSNAPO, and GSIMERI (comparing eastern Napo to Jaú)), to almost entirely differentiated ( $F_{st}$ : 0.81, comparing AFES to CAPA (comparing Espírito Santo to Panama)). Overall population  $F_{st}$  was very high  $\sim 0.196$  [0.188-0.204], indicating substantial population level differentiation among focal areas for *Pseudopipra*. Locality codes are the same as those in Supplementary Figure 9.





### **Supplementary Figure 11. EEMS model fit**

Regressing the observed dissimilarity between demes against the fitted dissimilarity between demes provides an indication of model fit (Petkova et al. 2015). For the present dataset, model fit (leftmost plot) was very high ( $R^2 = 0.865$ ). Within demes (central plot, within demes that represent more than a single individual), model fit was somewhat less, but still high ( $R^2 = 0.579$ ). Lastly, comparing observed dissimilarity between demes against great circle distance between demes suggested a strong signal of isolation by distance operating at the scale of the entire dataset ( $R^2 = 0.431$ ). Overall, the EEMS model does a very good job of describing spatially structured variation in this dataset.

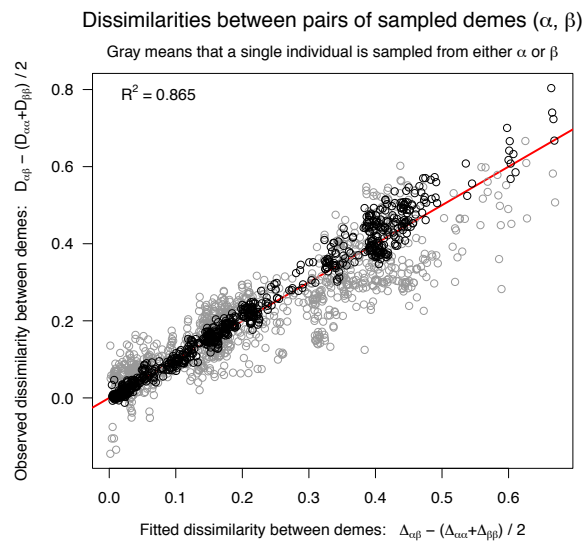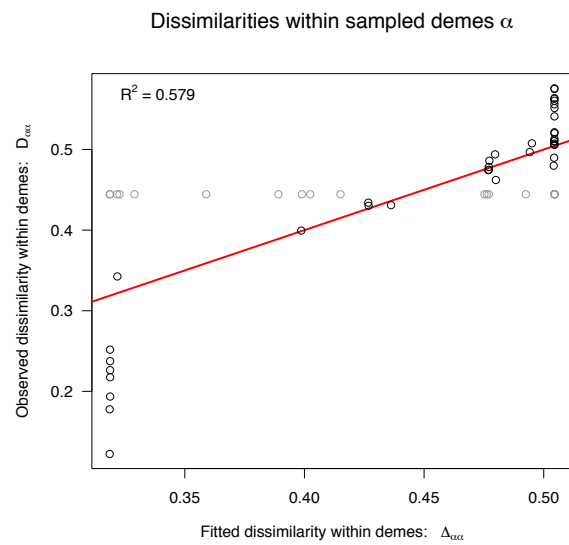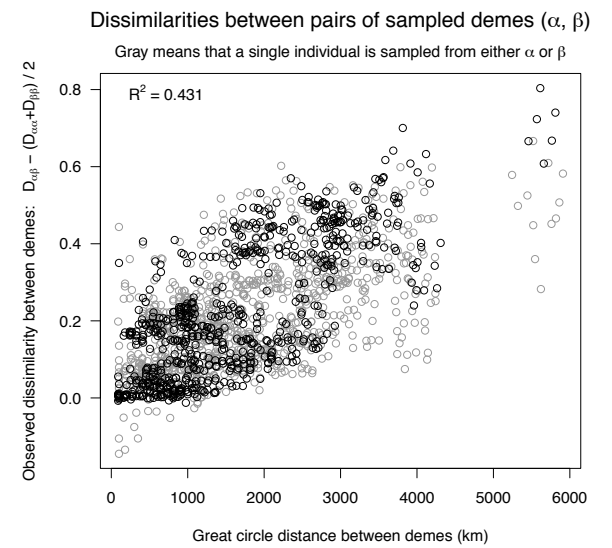

**Supplementary Figure 12. EEMS estimated genetic diversity**

Two broad clusters of relatively high genetic diversity (greatest heterozygosity) were detected in EEMS. The first is centered along the Amazon river and was relatively uniform within the northern Amazonian basin, reflecting relatively high diversity in the Guiana shield. The second relatively high diversity group reflected the introgressed western Napo population. Areas of relatively low genetic diversity included the Atlantic Forest, the Peruvian Andes, and Central American lineages. These results are generally consistent with our estimates of allelic richness (Supplementary Appendix for details).

# Posterior mean diversity rates $q$ (on the log10 scale)

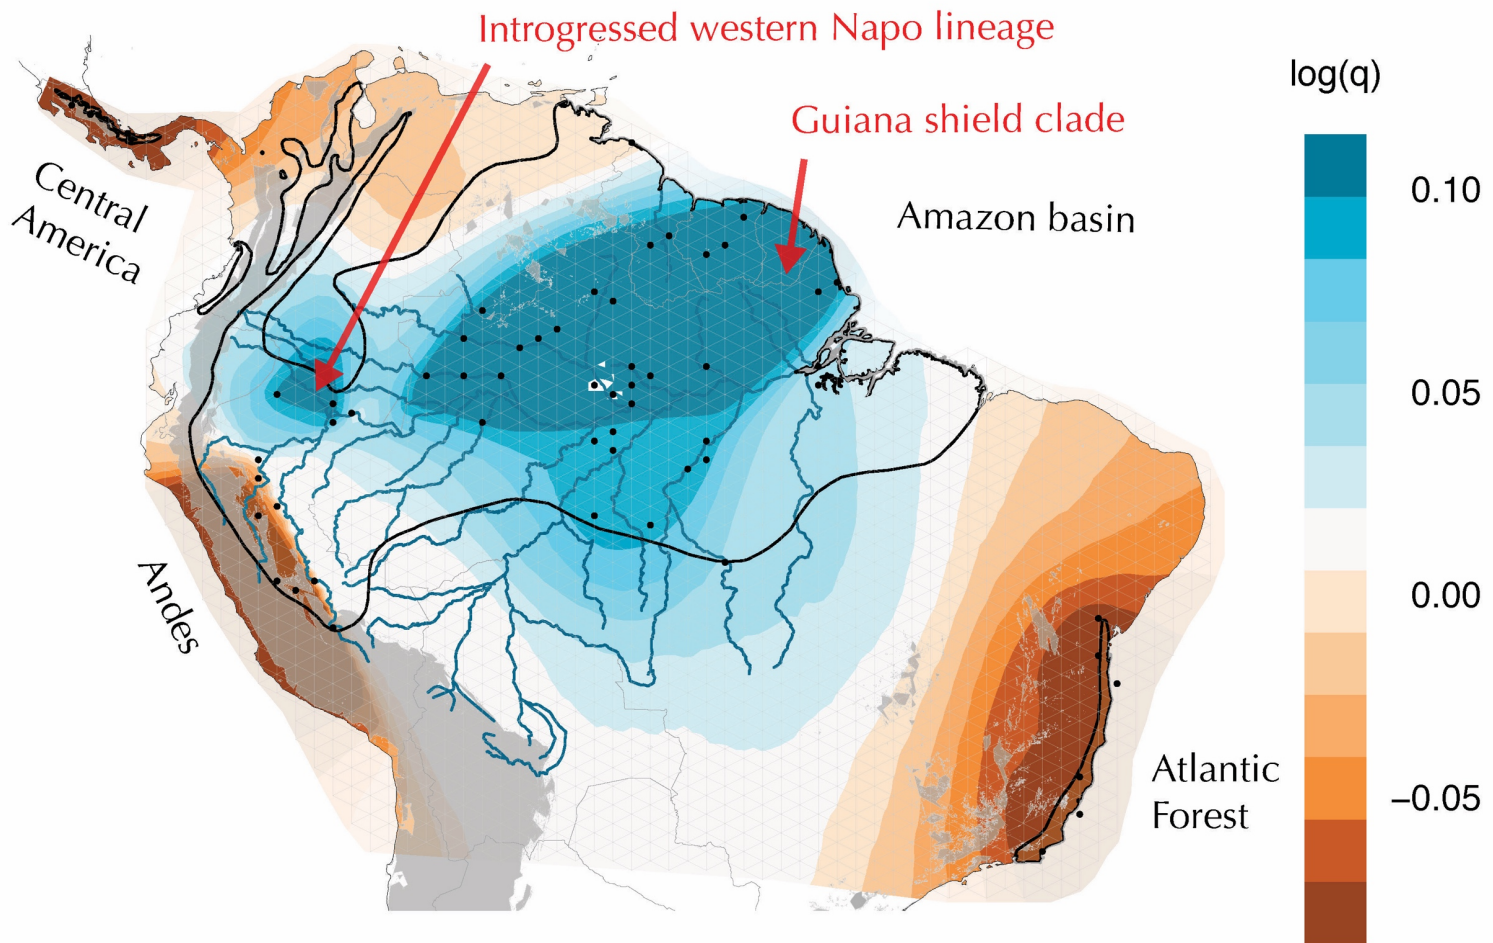

### **Supplementary Figure 13. Quantification of song variation**

All *Pseudopipra* songs start with a single broad frequency, buzzy note. In three of the song types (Types 1, 6, and 8), the initial buzzy note is also followed by one or two shorter tonal notes. We measured: 1) starting frequency, 2) ending frequency, 3) minimum frequency, 4) maximum frequency, 5) number of notes, and 6) duration of the entire song, the buzzy note, and the tonal notes when present. To obtain a conservative estimate of the number of individuals sampled, we took measurements of one song from each recording.

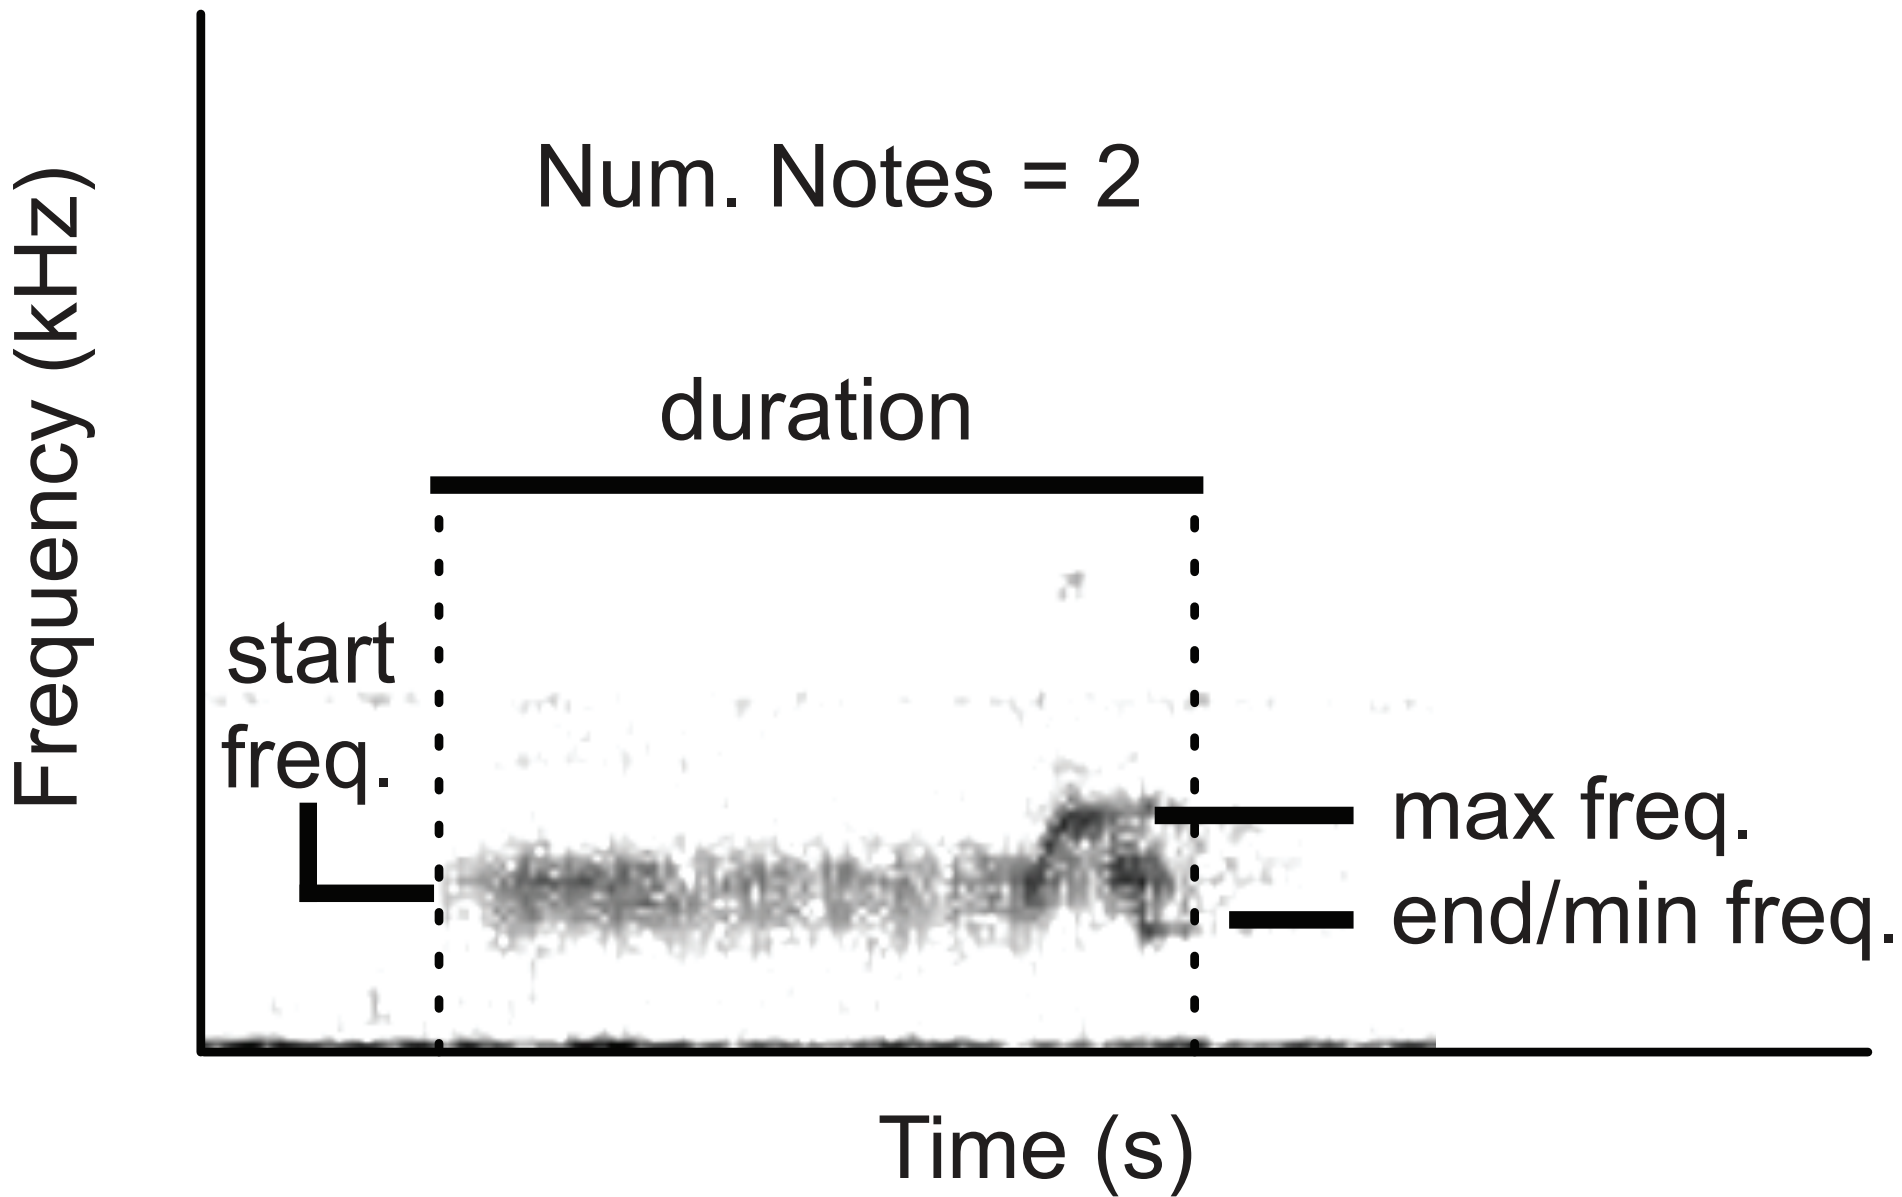

**Supplementary Figure 14. Expanded summary of lekking vocalization phenotypes**

PCA and logistic regression on lekking vocalizations (n=114, Supplementary Table 3) found significant differences among types ( $p < 0.001$ ). The first three axes of a PCA explained ~90% of the variation in lekking vocalization characters, with PC1 (~64%) primarily explaining variation in note number and frequency. Panels A and D show vocalization records plotted into the first and second components of a principle components analysis. Panels B and E show vocalization data points plotted into the second and third principle components. Lastly, Panels C and F are reproduced from Figure 8 and 9 in the main text. All vocal types can be quantitatively discriminated.

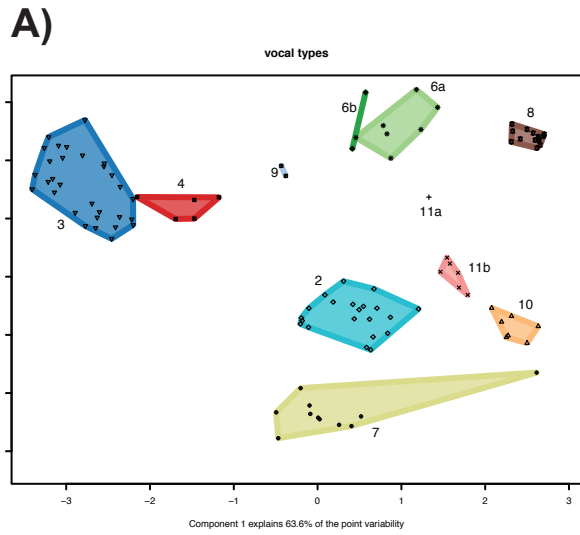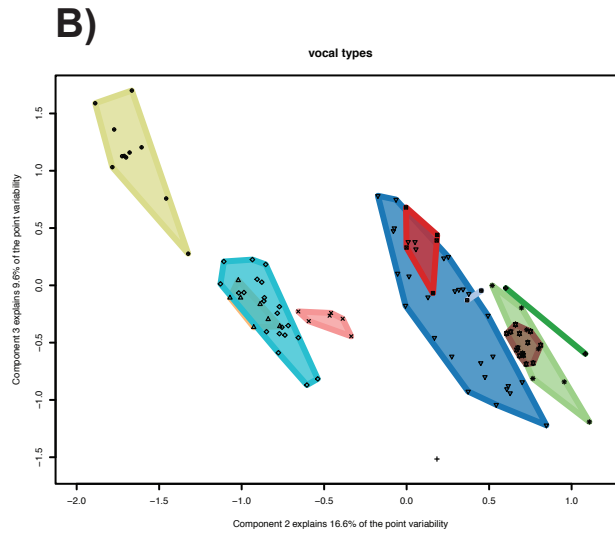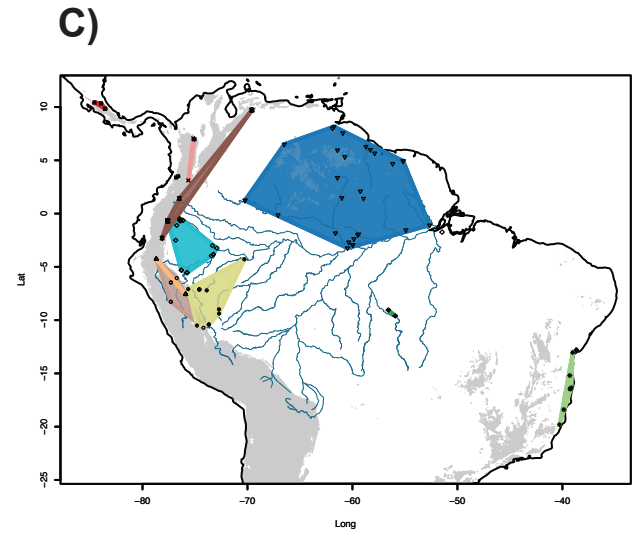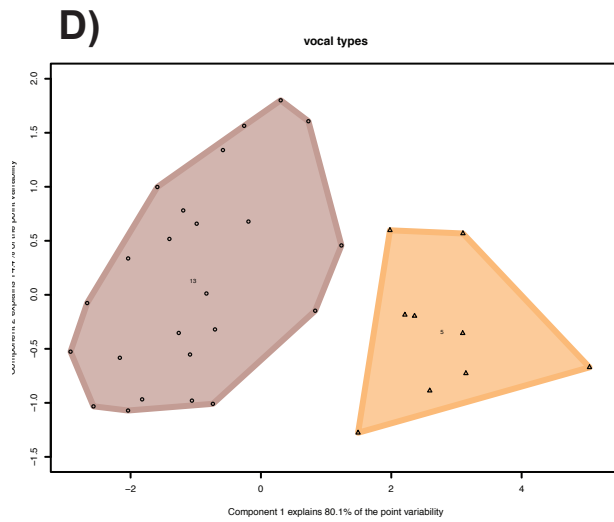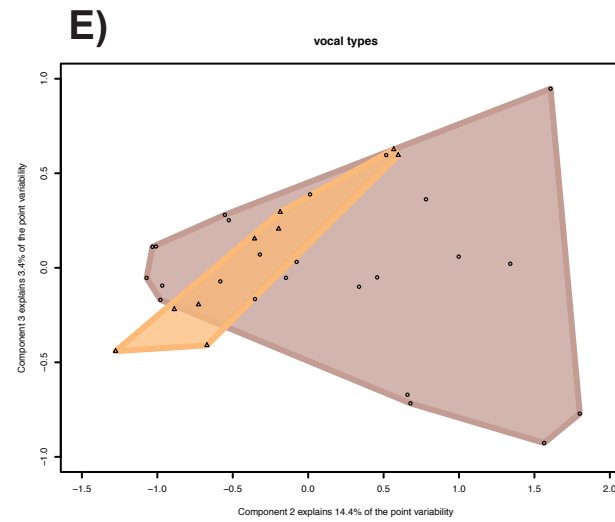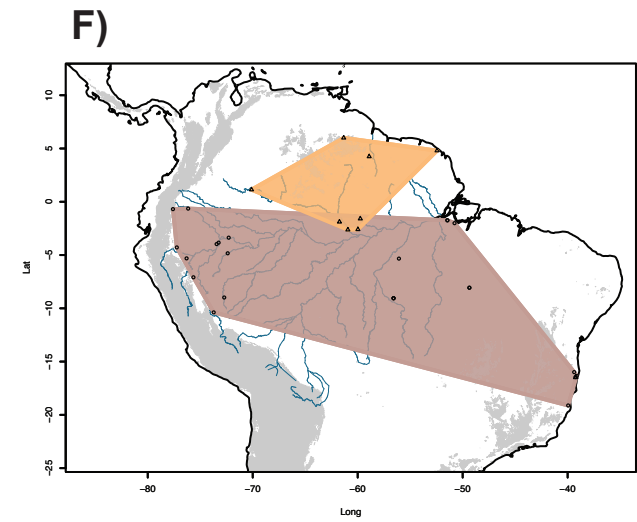



### **Supplementary Figure 15 – Vocalization Loading Plots**

PCA plots from Figure 14, shown here with loading vectors projected in to principle component space. The direction and length of the vectors indicate the direction and strength of the variation in a particular direction. Panels A and B show data for lek vocalizations, while C and D show data for call vocalizations.

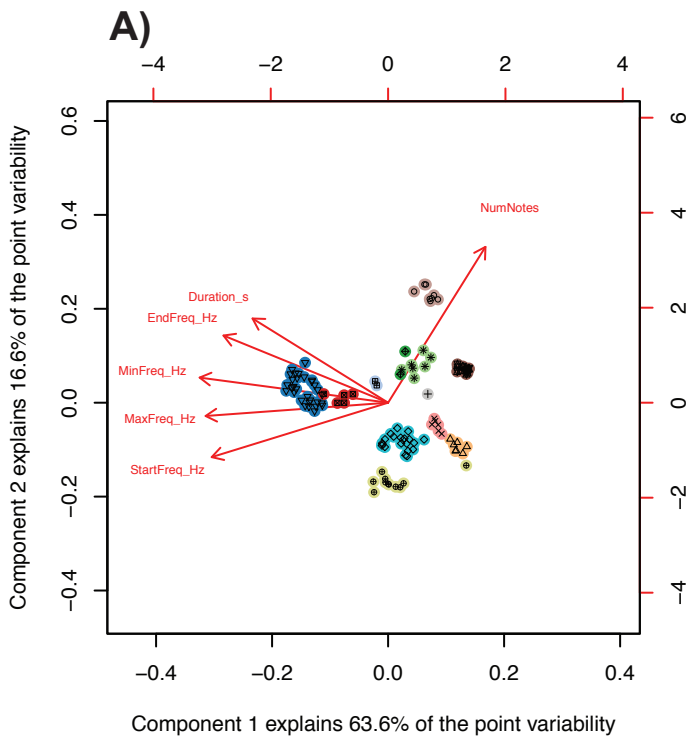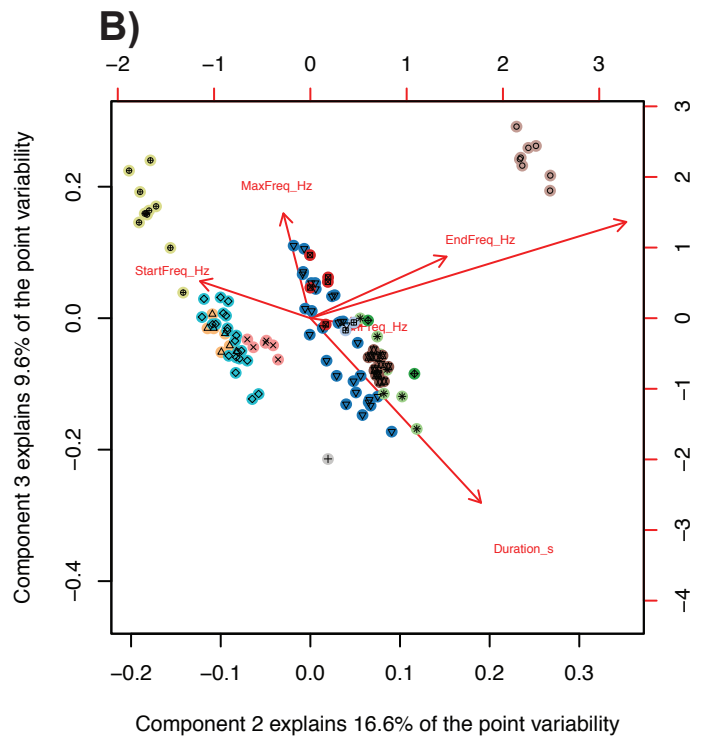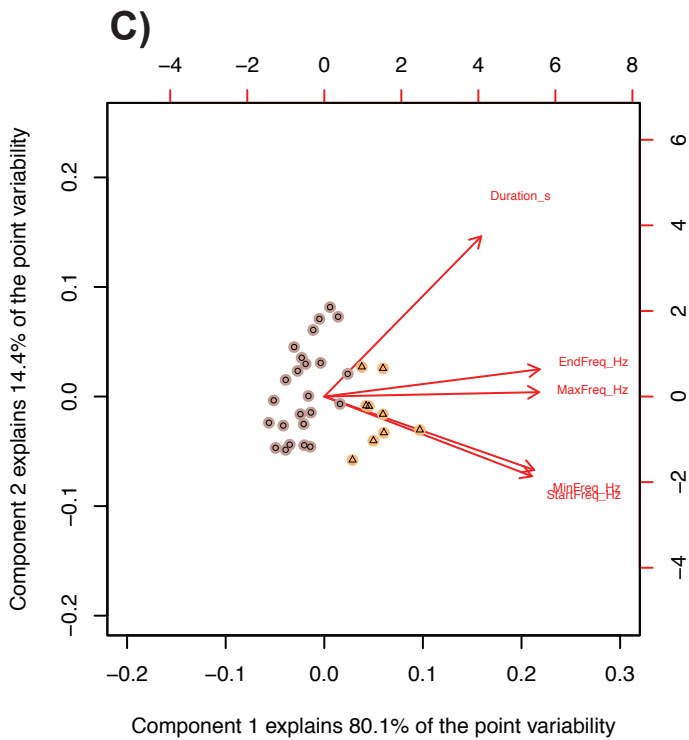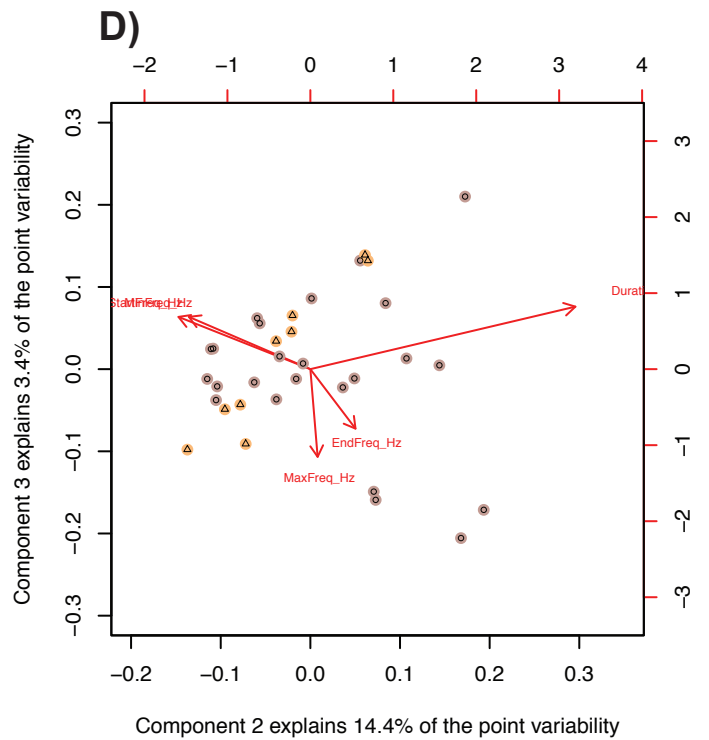

**Supplementary Figure 16 – Mitochondrial ND2 gene tree.**

Nodes with ultrafast bootstrap scores of lower than 95 are collapsed. The inferred topology is congruent with the topology presented in the main text derived from ddRAD sequencing data, with one exception: Western Napo haplotypes cluster with southern Amazonian lowland haplotypes (see results and discussion). Otherwise, there are no strongly supported conflicts (see discussion above) with our signal from nuclear genomic DNA.

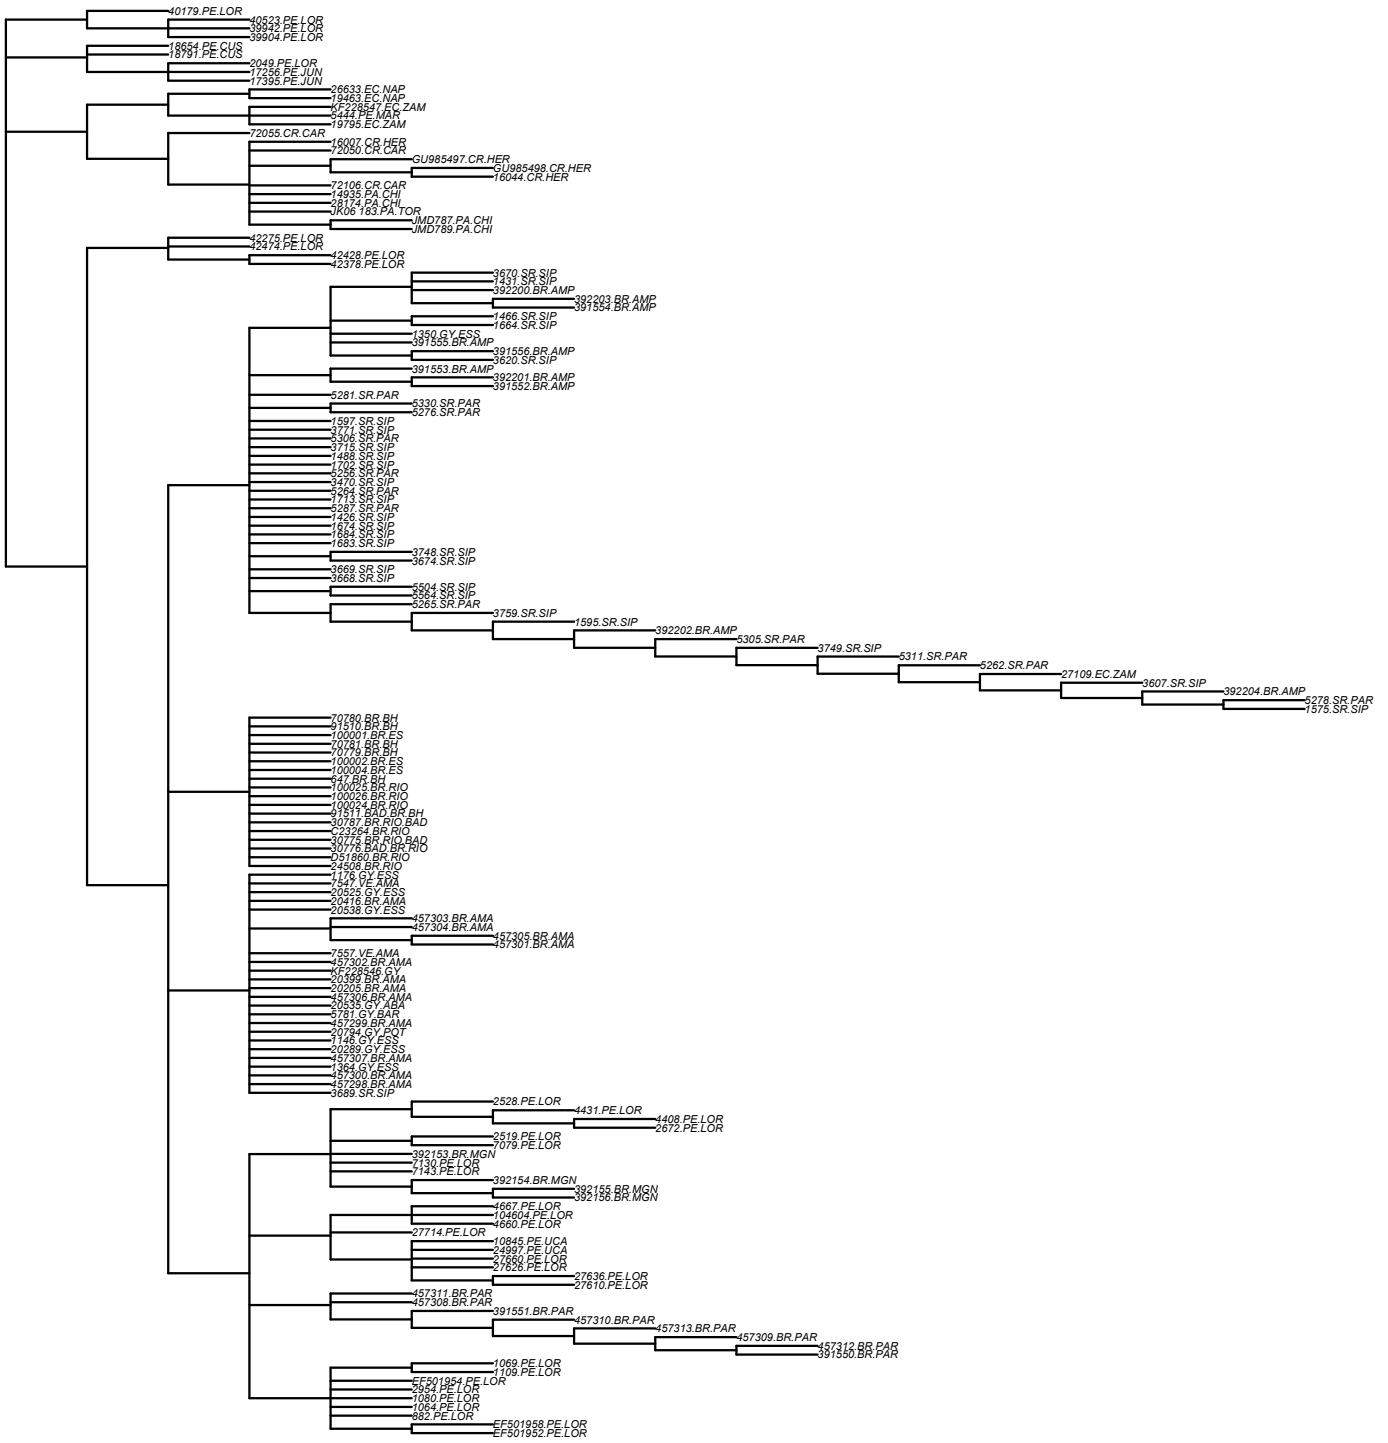

## Literature Cited

Gosselin T, Anderson EC, Ferchaud A-L. 2016. thierrygosselin/assigner: v.0.4.0 (Version 0.4.0). Zenodo. <http://doi.org/10.5281/zenodo.197418>.

Lawson DJ, Hellenthal G, Myers S, Falush D. 2012. Inference of Population Structure using Dense Haplotype Data. *PLOS Genetics*, 8:e1002453.

Petkova D, Novembre J, Stephens M. 2015. Visualizing spatial population structure with estimated effective migration surfaces. *Nature Genetics*, 48:94.

Weir BS, Cockerham CC. 1984. ESTIMATING F-STATISTICS FOR THE ANALYSIS OF POPULATION STRUCTURE. *Evolution*, 38:1358-1370.
